## Divergence amid recurring gene flow

# 1 Divergence amid recurring gene flow: complex demographic processes during 2 speciation are the growing expectation for forest trees

3  
4 **Constance E. Bolte<sup>1,4</sup>, Trevor M. Faske<sup>2</sup>, Christopher J. Friedline<sup>3</sup>, and Andrew J.  
5 Eckert<sup>3</sup>**

6  
7 <sup>1</sup>Integrative Life Sciences Doctoral Program, Virginia Commonwealth University,  
8 Richmond, VA, USA

9 <sup>2</sup>Ecology, Evolution & Conservation Biology Doctoral Program, University of Nevada,  
10 Reno, NV, USA

11 <sup>3</sup>Department of Biology, Virginia Commonwealth University, Richmond, VA, USA

12 <sup>4</sup>Corresponding author; boltece@vcu.edu

13

## 14 **Abstract**

15 Long-lived species of trees, especially conifers, often display weak patterns of  
16 reproductive isolation, but clear patterns of local adaptation and phenotypic divergence.

17 Discovering the evolutionary history of these patterns is paramount to a generalized  
18 understanding of speciation for long-lived plants. We focus on two closely related yet

19 phenotypically divergent pine species, *Pinus pungens* and *P. rigida*, that co-exist along  
20 high elevation ridgelines of the southern Appalachian Mountains. Based on genome-wide

21 RADseq data, patterns of population structure for each species were uncorrelated to  
22 geography and the environment. Signals of admixture, however, were present range-

23 wide. When combined with information from contemporary and historical species  
24 distribution models, these patterns are consistent with a complex evolutionary history of

25 speciation. This was confirmed using inferences based on the multidimensional site-  
26 frequency spectrum, where demographic modeling inferred recurring gene flow since

27 divergence (9.3 – 15.4 million years ago) and population size reductions that align in  
28 timing with the last interglacial period (~120 – 140 thousand years ago). This suggests

29 that phenotypic and genomic divergence, including the evolution of divergent  
30 phenological schedules leading to partial reproductive isolation, as previously

## Divergence amid recurring gene flow

31 documented for these two species, can happen rapidly, even between long-lived species  
32 of pines.

33

34 **Keywords:** conifer speciation, *Pinus pungens*, *Pinus rigida*, reproductive isolation,  
35 population genetics, species distributions

36

### 37 **Statements and Declarations**

38 The authors have no financial or proprietary interests in any material discussed in this  
39 article. Field sampling permits at National Parks and State Parks were obtained prior to  
40 collecting leaf tissue: ACAD-2017-SCI-007, BLRI-2013-SCI-0027, GRSM-2017-SCI-  
41 2028, ZZ-RCP-112514, and SFRA-1725.

42

### 43 **Acknowledgements**

44 This research was funded by Virginia Commonwealth University (VCU) Department of  
45 Biology, VCU Integrative Life Sciences, and National Science Foundation (NSF) awards  
46 to Andrew J. Eckert (NSF-EF-1442486) and Christopher J. Friedline (NSF-NPGI-PRFB-  
47 1306622). We thank Mitra Menon and Rebecca Piri for their assistance with field  
48 sampling, Brandon Lind for providing computational support, and the undergraduate  
49 researchers who helped with the DNA extraction protocol: Kaylyn Carver, Casey Harless,  
50 and Leslie Ranson. Demographic inference requires large computational resources, and  
51 we thank the VCU Center for High Performance Computing for providing those.

52

53

## Divergence amid recurring gene flow

### 54 **Introduction**

55

56 The process of speciation has been characterized as a continuum of divergence  
57 underpinned with the expectation that reproductive isolation strengthens over time  
58 leading to increased genomic conflict between species (Seehausen et al. 2014). While  
59 the term continuum suggests linear directionality, it is better thought of as a multivariate  
60 trajectory that is nontemporal, allowing stalls and even breakdown of reproductive barriers  
61 in the overall progression toward complete reproductive isolation (Cannon and Petit 2020;  
62 Kulmuni et al. 2020). Indeed, speciation can occur with or without ongoing gene flow and  
63 demographic processes such as expansions, contractions, isolation, and introgression  
64 leave detectable genetic patterns within and among populations of species that affect the  
65 evolution of reproductive isolation (Nosil 2012; e.g., Gao et al. 2012). Divergence histories  
66 with gene flow are an emerging pattern for species of forest trees with reproductive  
67 isolation often developing through prezygotic isolating mechanisms and reinforced by  
68 environmental adaptation (Abbott 2017; Cavender-Bares 2019). Together, these two  
69 processes can facilitate the development of genomic incompatibilities over time (Baack  
70 et al. 2015).

71

72 Climate and geography are well-established drivers of demographic processes and  
73 patterns (Hewitt 2001). For the past 2.6 million years, Quaternary climate has oscillated  
74 between glacial and interglacial periods causing changes in species distributions, but the  
75 significance of these changes and their influence on population differentiation has varied  
76 by region and taxa (Hewitt 2004; Lascoux et al. 2004). In North America, the effects of

## Divergence amid recurring gene flow

77 Quaternary climate on tree species distributions and patterns of genetic diversity have  
78 been profound but more drastic for species native to northern (i.e., previously glaciated)  
79 and eastern regions. For instance, the geographical distribution of white oak (*Quercus*  
80 *alba* L.), a native tree species to eastern North America, experienced greater shifts since  
81 the last interglacial period, approximately 120 thousand years ago (kya), compared to the  
82 distributional shifts of valley oak (*Quercus lobata* Née) in California (Gugger et al. 2013).  
83 For the latter, distributional, and hence niche, stability was correlated with higher levels  
84 of genetic diversity.

85  
86 Given the climate instability of eastern North America since the last interglacial period  
87 (LIG; ~120 kya), a host of phylogeographic studies have reported genetic diversity  
88 estimates for taxa of this region and the genetic structuring of populations due to  
89 geographic barriers such as the Appalachian Mountains and Mississippi River (Soltis et  
90 al. 2006) as well as postglacial expansion (e.g., Gougherty et al. 2020). The vast majority  
91 of tree taxa in these studies, however, were angiosperms, with the divergence history of  
92 only one closely related pair of conifer species native to this region, *Picea mariana* (Mill.)  
93 Britton, Sterns, & Poggenb. and *P. rubens* Sarg., being fully characterized (Perron et al.  
94 2000; Lafontaine et al. 2015). The relative differences in geographical distributions and  
95 genetic diversities across *P. mariana* and *P. rubens*, as well as models of demographic  
96 inference, suggest a progenitor-derivative species relationship that initiated  
97 approximately 110 kya through population contractions and geographical isolation.  
98 Despite this history, these two species actively hybridize today. In general, speciation  
99 among conifer lineages remains an enigmatic process (Bolte and Eckert 2020), largely

## Divergence amid recurring gene flow

100 because there is a mismatch between species-level taxonomy and the existence of  
101 reproductive isolation, so that hybridization among species is common both naturally as  
102 well as artificially (Critchfield 1986). The ability to hybridize, moreover, is idiosyncratic,  
103 with examples ranging from well-developed incompatibilities among populations within  
104 species (e.g., *P. muricata* D. Don; Critchfield 1967) to the almost complete lack of  
105 incompatibilities among diverged and geographically distant species (*P. wallichiana* A. B.  
106 Jacks. from central Asia and *P. monticola* Douglas ex D. Don from western North  
107 America; Wright 1959). Thus, the tempo and mode for the evolution of reproductive  
108 isolation for conifers remains largely unexplained despite decades of research into  
109 patterns of natural hybridization, crossing rates, and the mechanisms behind documented  
110 incompatibilities (McWilliam 1959; Kriebel 1972; Hagman 1975; Critchfield 1986;  
111 Vasilyeva and Goroshkevich 2018).

112

113 The key to understanding the evolution of reproductive isolation, and hence a more  
114 developed explanation of the process of speciation for conifers, is the role of demography  
115 and gene flow during the divergence among lineages. Analytical approaches have been  
116 developed to infer past demographic processes from population genomic data, which can  
117 now easily be generated even for conifers (Parchman et al. 2018). While many studies  
118 have used demographic inference methods to describe the phylogeographic history of a  
119 single species (e.g., Gugger et al. 2013; Li et al. 2013; Bagley et al. 2020; Ju et al. 2019;  
120 Park and Donoghue 2019; Capblancq et al. 2020; Yang et al. 2020; Labiszak et al. 2021),  
121 some of these established methods have also be used to infer divergence histories  
122 between two or three species (e.g., Zou et al. 2013; Christe et al. 2017; Kim et al. 2018;

## Divergence amid recurring gene flow

123 Menon et al. 2018). Single species inferences have found that the last glacial maximum  
124 (LGM; ~22,000 years ago) affected distributional shifts and intraspecific gene flow  
125 dynamics, while multispecies studies have focused almost solely on how these climatic  
126 oscillations drove periods of increased and decreased interspecific gene flow which  
127 contributed to the formation of environmentally dependent hybrid zones, ancient  
128 periodical introgression, or adaptive divergence in the development of reproductive  
129 isolation.

130  
131 The number of potential divergence histories underlying even a modest number of  
132 species is vast. The preemptive formation of a hypothesis from historical species  
133 distribution modeling (SDM), however, can aid in defining a more realistic set of models  
134 from which to make inference, as well as to examine the impact of the climate change on  
135 genetic diversity and demographic processes (Carstens and Richards, 2007). For  
136 example, Lima et al. (2017) modeled distributional changes for *Eugenia dysenterica* DC.  
137 between the LGM and today which led to a hypothesis that range stability was more likely  
138 than range expansion or contraction in this South American region. Their SDM informed  
139 hypothesis was supported by range-wide, *E. dysenterica* genetic data. Likewise, SDMs  
140 across several time points allows for estimation of habitat suitability change (i.e., a proxy  
141 for contraction or expansion) and distributional overlap of multiple species (i.e., potential  
142 gene flow). With these quantified changes, testable hypotheses emerge, leading to more  
143 deliberate investigations of speciation through justified parameter selection (Richards et  
144 al. 2007). Of course, there are inherent limitations associated with SDMs and interpreting  
145 historical distributions should be done cautiously but using SDMs to complement

## Divergence amid recurring gene flow

146 demographic inference is now common in the field of phylogeography (Hickerson et al.  
147 2010; Gavin et al. 2014; Peterson and Anamza 2015). Indeed, where a species occurs is  
148 determined by its traits and thus genetics. Ikeda et al. (2017) found that SDM predictions  
149 under future climate scenarios improved with acknowledgement of local adaptation in  
150 *Populus fremontii* S. Watson (i.e., three identified genetic clusters across the full species  
151 distributional range were modeled independently).

152  
153 Here, we focus on two closely related, yet phenotypically diverged, pine species, Table  
154 Mountain pine (*Pinus pungens* Lamb.) and pitch pine (*Pinus rigida* Mill.). Recent  
155 estimates from multiple time-calibrated phylogenies have placed the time of divergence  
156 in the range of 1.5 to 17.4 million years ago (mya; Hernandez-Leon et al. 2013; Saladin  
157 et al. 2017; Gernandt et al. 2018; Jin et al. 2021), with these studies either placing them  
158 as sister species (e.g., Hernandez-Leon et al. 2013; Saladin et al. 2017) or as part of a  
159 clade with *P. serotina* Michx. as the sister to *P. rigida* (e.g., Gernandt et al. 2018; Jin et  
160 al. 2021). Changes in climate, fire regime, and geographic distributions have likely  
161 influenced species divergence (Keeley 2012). This is plausible given that *P. pungens*  
162 populations are restricted to high elevations of the Appalachian Mountains, while the  
163 much larger distribution of *P. rigida* ranges from Georgia into portions of eastern Canada.  
164 It is particularly interesting that these recently diverged species are found in sympatry,  
165 yet hybridization has rarely been observed in the field (Zobel 1969), although they can be  
166 reciprocally crossed to yield viable offspring (Critchfield 1963). An ecological study of  
167 three sympatric *P. pungens* and *P. rigida* populations indicated that the timing of pollen  
168 release was separated by approximately four weeks, enough to sustain partial

## Divergence amid recurring gene flow

169 reproductive isolation at these sites (Zobel 1969), which is a common contributor to pre-  
170 zygotc isolation among conifer species (Dorman and Barber 1956; Critchfield 1963). It  
171 was also noted that while *P. pungens* was most densely populated on arid, rocky, steep  
172 southwestern slopes, *P. rigida* was less confined to these areas (Zobel 1969), thus  
173 suggesting environmental adaptation may also be important in the divergence of these  
174 two closely related species.

175

176 We hypothesized that *P. pungens* and *P. rigida* experienced speciation with gene flow  
177 followed by population contraction and isolation (i.e., different refugia) initiated during the  
178 LGM. This period of isolation could potentially explain the striking divergence in trait  
179 values and phenological schedules between these two species. This hypothesis was  
180 assessed and revised using distributional overlap in habitat suitability over the last  
181 120,000 years and tested using a multidimensional, folded site frequency spectrum from  
182 2168 genome-wide, unlinked single nucleotide polymorphisms (SNPs) across 300 trees.  
183 The SDM-informed hypothesis was supported. Divergence occurred amid ongoing  
184 symmetrical gene flow for the past 9.3 – 15.4 million years, depending on generation time,  
185 and both species experienced major contraction in effective population size during the  
186 LIG. The best supported model also included a reduction in gene flow since the LIG which  
187 we sought to explain using population genetic analyses and environmental associations.  
188 Prezygotc reproductive isolation due to differing phenological schedules appears to be  
189 the primary mechanism involved in the maintenance of species boundaries and an  
190 emerging pattern in conifer speciation.

191



## Divergence amid recurring gene flow

192

193

### 194 **Methods**

195

#### 196 ***Sampling***

197 Range-wide samples of needle tissue were obtained from 14 populations of *Pinus*  
198 *pungens* and 19 populations of *Pinus rigida* (Fig. 1). Each population consisted of 4-12  
199 trees with each sampled tree distanced by approximately 50 m from the next to avoid  
200 potential kinship (Table 1). Needle tissue was dried using silica beads, then approximately  
201 10 mg of tissue was cut and lysed for DNA extraction.

202

#### 203 ***DNA sequence data***

204 Genomic DNA was extracted from all 300 sampled trees using DNeasy Plant Kits  
205 (Qiagen) following the manufacturer's protocol. Four ddRADseq libraries (Peterson et al.  
206 2012), each containing up to 96 multiplexed samples, were prepared using the procedure  
207 from Parchman et al. (2012). EcoRI and MseI restriction enzymes were used to digest all  
208 four libraries before performing ligation of adaptors and barcodes. After PCR, agarose  
209 gel electrophoresis was used to separate then select DNA fragments between 300-500  
210 bp in length. The pooled DNA was isolated using a QIAquick Gel Extraction Kit (Qiagen).  
211 Single-end sequencing was conducted on Illumina HiSeq 4000 platform by Novogene  
212 Corporation (Sacramento, CA). Raw fastq files were demultiplexed using GBSX (Herten  
213 et al. 2015) version 1.2, allowing two mismatches (-mb 2). The dDocent bioinformatics  
214 pipeline (Puritz et al. 2014) was used to generate a reference assembly and call variants.

## Divergence amid recurring gene flow

215 The reference assembly optimized using shell scripts and documentation within dDocent  
216 (cutoffs: individual = 6, coverage = 6; clustering similarity: -c 0.92), utilizing cd-hit-est (Fu  
217 et al. 2012) for assembly. The initial variant calling produced 87,548 single nucleotide  
218 polymorphisms (SNPs) that was further filtered using *vcftools*, (Danecek et al. 2011),  
219 version 0.1.15. In final, we retained only biallelic SNPs with sequencing data for at least  
220 50% of the samples, minor allele frequency (MAF) > 0.01, summed depth across samples  
221 > 100 and < 10000, and alternate allele call quality  $\geq$  50. To account for linkage  
222 disequilibrium, which if not properly acknowledged can lead to erroneous inferences of  
223 demographic history (Gutenkunst et al. 2009), we thinned the dataset to one SNP per  
224 contig (--thin 100). Additionally, stringent filtering steps to were taken to minimize the  
225 potential misassembly of paralogous genomic regions. Removing loci with excessive  
226 coverage and retaining only loci with two alleles present, as above, should ameliorate the  
227 influence of misassembled paralogous loci in our data (Hapke and Thiele 2016; McKinney  
228 et al. 2018). Lastly, we retained loci with  $F_{IS} > -0.5$ , as misassembly to paralogous  
229 genomic regions can lead to abnormal heterozygosity (Hohenlohe et al. 2013; McKinney  
230 et al. 2017). The reduced 2168 SNP dataset was used in all analyses.

231

### 232 ***Population structure and genetic diversity***

233 Patterns of genetic diversity and structure within and between *P. pungens* and *P. rigida*  
234 were assessed using a suite of standard methods. Overall patterns of genetic structure  
235 were investigated using principal component analysis (PCA), as employed in the prcomp  
236 function of the *stats* version 4.0.4 package, and population graphs using the *popgraph*  
237 version 1.5.2 package (Dyer and Nason 2004) in R version 3.6.2 (R Development Core

## Divergence amid recurring gene flow

238 Team, 2021). Genetic diversity within each species was examined using multilocus  
239 estimates of observed and expected heterozygosity ( $H_o$  and  $H_e$ ) for each population using  
240 a custom R script. An individual-based assignment test was conducted using  
241 *fastSTRUCTURE* (Raj et al. 2014) with cluster assignments ranging from  $K = 2$  to  $K = 7$ .  
242 Ten replicate runs of each cluster assignment were conducted. The cluster assignment  
243 with the highest log-likelihood value was determined to be the best fit. Individual  
244 admixture assignments were then aligned and averaged across the 10 runs using the  
245 *pophelper* version 1.2.0 (Francis 2017) package in R. Third, multilocus, hierarchical  
246 fixation indices ( $F$ -statistics) were defined by nesting trees into populations and  
247 populations into species, with  $F_{CT}$  describing differentiation between species and  $F_{SC}$   
248 describing population differentiation within species (Yang 1998).  $F$ -statistics and  
249 associated confidence intervals (95% CIs) from bootstrap resampling ( $n = 100$  replicates)  
250 were calculated in the *hierfstat* version 0.5-7 package (Goudet and Jombart 2020) in R.

251  
252 To assess influences on within species genetic structure, Mantel tests (Mantel 1967) were  
253 used to examine Isolation-by-Distance (IBD; Wright 1943) and Isolation-by-Environment  
254 (IBE; Wang and Bradburd 2014). In these analyses, the Mantel correlation coefficient ( $r$ )  
255 was calculated between linearized, pairwise  $F_{ST}$ , estimated with the method of Weir and  
256 Cockerham (1984) using the *hierfstat* package in R, and either geographical (IBD) or  
257 environmental (IBE) distances. For geographical distances, latitude, and longitude  
258 records for each tree in a population were averaged to obtain one representative  
259 coordinate per population. Geographic distances among populations were then  
260 calculated using the Vincenty (ellipsoid) method within the *geosphere* version 1.5-10

## Divergence amid recurring gene flow

261 package (Hijmans 2019) in R. Environmental distances were calculated as Euclidean  
262 distances using extracted raster values associated with the mean population coordinates  
263 from 19 bioclimatic variables, downloaded from WorldClim at 30 arc second resolution  
264 (version 2.1; Fick and Hijmans 2017). Values associated with the mean population  
265 coordinates for were extracted using the *raster* version 2.5-7 R package. Environmental  
266 data were centered and scaled prior to estimation of distances. Additionally, we used a  
267 Mantel test to assess correlation between population-based environmental distances and  
268 population-based geographic distances.

269

### 270 ***Associations between genetic structure and environment***

271 To test the multivariate relationships among genotype, climate, and geography,  
272 redundancy analysis (RDA) was conducted using the *vegan* version 2.5-7 package  
273 (Oksanen et al. 2020) in R version 4.0.4 (R Core Development Team, 2021). Genotype  
274 data were coded as counts of the minor allele for each sample (i.e., 0,1, or 2 copies) and  
275 then standardized following Patterson et al. (2006). Climate raster data (i.e., 19  
276 bioclimatic variables at 30 arc second resolutions), as well as elevational raster data from  
277 WorldClim, were extracted, as mentioned above, from geographic coordinates for each  
278 sampled tree and then tested for correlation using Pearson's correlation coefficient ( $r$ ).  
279 Five bioclimatic variables that were not highly correlated ( $r < |0.75|$ ) and known to  
280 influence diversification in the genus *Pinus* were retained for analysis: Bio 2 (mean diurnal  
281 range), Bio 10 (maximum temperature of the warmest quarter), and Bio 11 (minimum  
282 temperature of the coldest quarter), Bio 15 (precipitation seasonality), and Bio 17  
283 (precipitation of the driest quarter). The full explanatory data set included these five

## Divergence amid recurring gene flow

284 bioclimatic variables, latitude, longitude, and elevation. The multivariate relationship  
285 between genetic variation, climate, and geography was then evaluated through RDA.  
286 Statistical significance of the RDA model ( $\alpha = 0.05$ ), as well as each axis within the model,  
287 was assessed using a permutation-based analysis of variance (ANOVA) procedure with  
288 999 permutations (Legendre and Legendre 2012). The influence of predictor variables,  
289 as well as their confounded effects, in RDA were quantified using variance partitioning as  
290 employed in the *varpart* function of *vegan* package in R.

291

292

### 293 ***Species distribution modeling***

294 To help formulate a testable hypothesis in the inference of demography from genomic  
295 data, species distribution modeling (SDM) was performed for each species to identify  
296 areas of suitable habitat under current climate conditions and across three historical time  
297 periods (see Richards et al. 2007). These temporal inferences were then used to help  
298 identify plausible demographic responses. For example, if overlap in modeled habitat  
299 suitability changed over time, the hypothesis for demographic inference would include  
300 changes in gene flow parameters over time. If the amount of suitable habitat changed  
301 over time, the hypothesis would also include changes in effective population size to allow  
302 for potential expansions or contractions. This in effect helps to constrain the possible  
303 parameter space for exploration.

304

305 Occurrence records for *P. pungens* were downloaded from GBIF ([www.gbif.org](http://www.gbif.org)) and  
306 combined with known occurrences published by Jetton et al. (2015). For *P. rigida*, all

## Divergence amid recurring gene flow

307 occurrence records were downloaded from GBIF. Records were examined for presence  
308 within or close to the known geographical range of each species (Little 1971). Records  
309 far outside the known geographic range were pruned. The remaining locations were then  
310 thinned to one occurrence per 10 km to reduce the effects of sampling bias using the  
311 *spThin* version 0.1.0.1 package (Aiello-Lammens et al. 2015) in R. The resulting  
312 occurrence dataset included 84 records for *P. pungens* and 252 records for *P. rigida*  
313 (Online Resource 2). All subsequent analyses were performed in R version 3.6.2 (R  
314 Development Core Team, 2021).

315

316 The same bioclimatic variables (Bio2, Bio10, Bio11, Bio15, Bio17) selected for RDA were  
317 used in species distribution modeling but were downloaded from WorldClim version 1.4  
318 (Hijmans et al. 2005) at 2.5 arc minute resolution. The change in resolution from above  
319 was because paleo-climate data in 30 arc second resolution were not available for the  
320 LGM. Paleoclimate raster data for the LGM (~21,000 years ago) and Holocene (HOL,  
321 ~6000 years ago) were based on three General Circulation Models (GCMs; CCSM4,  
322 MIROC-ESM, and MPI-ESM). Ensembles were built by averaging the grid cell values  
323 across the three GCMs for each time period, which were then used to predict species  
324 distributions and habitat suitability in the past. For comparative purposes, SDMs were  
325 also produced from each individual GCM for each time period since the LGM.  
326 Paleoclimate data for the LIG (~120,000 years ago; Otto-Bliesner et al. 2006) were only  
327 available at 30 arc second resolution and required downscaling to 2.5 arc minute  
328 resolution using the aggregate function (fact=5) of the *raster* package. Only one GCM is  
329 available for the LIG; therefore, no ensemble was built.

## Divergence amid recurring gene flow

330

331 Raster layers were cropped to the same extent using the *raster* package to include the  
332 most northern and eastern extent of *P. rigida*, and the most western and southern extent  
333 of *P. pungens*. Species distribution models (SDMs) were built using MAXENT version 3.4.1  
334 (Phillips et al. 2017) and all possible features and parameter combinations were  
335 evaluated using the *ENMeval* version 2.0.0 R package (Kass et al. 2021). Metadata  
336 about model fitting and evaluation are available within Online Resource 2.

337

338 The selected features used in predictive modeling were those associated with the best-  
339 fit model as determined using AIC. Raw raster predictions were standardized to have the  
340 sum of all grid cells equal the value of one using the *raster.standardize* function in the  
341 *ENMTools* version 1.0.5 (Warren et al. 2021) R package. Standardized predictions were  
342 then transformed to a cumulative raster prediction with habitat suitability scaled from 0  
343 to 1, allowing for quantitative SDM comparisons across species and time. Next, SDM  
344 cumulative raster predictions were converted into coordinate points using the *sf* version  
345 0.9-7 R package to calculate the number of points with habitat suitability values greater  
346 than 0.5 (i.e., moderate to high suitability areas). Population size expansion or  
347 contraction was hypothesized if the number of points increased or decreased over time,  
348 respectively. Overlap (i.e., shared points across species) in SDM predictions for each  
349 time period was measured using the *inner\_join* function in the *dplyr* version 1.0.5 R  
350 package. The extent of modeled species distributional overlap was also quantified using  
351 the *raster.overlap* function in *ENMTools*, thus providing measures for Schoener's *D*  
352 (1968) and Warren's *I* (Warren et al. 2008).

## Divergence amid recurring gene flow

353

### 354 **Demographic modeling**

355 Demographic modeling was conducted using Diffusion Approximation for Demographic  
356 Inference ( $\partial\alpha\partial i$  v.2.0.5; Gutenkunst et al. 2009). A model of pure divergence (SI; strict  
357 isolation) was compared against eleven other demographic models representing different  
358 potential divergence scenarios with or without gene flow and effective population size  
359 changes (Online Resource 4, Fig. S4). Based on SDM predictions across four time points,  
360 we hypothesized that a model that allowed changes in effective population size and rate  
361 of gene flow before the LIG would best fit the genetic data. Ten replicate runs of each  
362 model were performed in  $\partial\alpha\partial i$  with a 200 x 220 x 240 grid space and the nonlinear  
363 Broyden-Fletcher-Goldfarb-Shannon (BFGS) optimization routine. Model selection was  
364 conducted using Akaike information criterion (AIC; Akaike 1974). The best replicate run  
365 (highest log composite likelihood) for each model was then used to calculate  $\Delta\text{AIC}$   
366 ( $\text{AIC}_{\text{model } i} - \text{AIC}_{\text{best model}}$ ) scores (Burnham and Anderson 2002). From the best supported  
367 model, upper and lower 95% confidence intervals (CIs) for all parameters were obtained  
368 using the Fisher Information Matrix (FIM)-based uncertainty analysis. Unscaled  
369 parameter estimates and their 95% CIs were obtained using a per lineage substitution  
370 rate of  $7.28 \times 10^{10}$  substitutions/site/year rate for *Pinaceae* (De La Torre et al. 2017) and  
371 two possible values for generation time, 15 and 25 years, for comparative purposes.

372

373

374

375



## Divergence amid recurring gene flow

### 376 **Results**

377

#### 378 ***Population structure and genetic diversity***

379 Principal component analysis (PCA) showed clear separation at the species level along  
380 PC1 which explained 4.232% of the variation across the 2168 SNP x 300 tree data set  
381 (Fig. 2a). Of the 2168 SNPs analyzed, 380 and 196 SNPs were fixed in *P. pungens* and  
382 *P. rigida*, respectively. Lack of population clustering within each species was observed  
383 when the PCA was labeled by population (Online Resource 4, Fig. S1). Using hierarchical  
384 *F*-statistics, the estimate of differentiation between species ( $F_{CT}$ ) was 0.117 (95% CI:  
385 0.099 – 0.136) and similarly to that among all sampled populations ( $F_{ST} = 0.123$ , 95% CI:  
386 0.106 – 0.143), thus highlighting structure is largely due to differences between species.  
387 Differentiation among populations within species was consequently much lower ( $F_{SC} =$   
388 0.007 (95% CI: 0.0055-0.0088) whether analyzed jointly ( $F_{SC}$ ) or separately (see Table  
389 2). In the analysis of structure,  $K = 2$  had the highest log-likelihood values (Fig. 2b).  
390 Admixture in small proportions (assigning to the other species by 2-10%) was observed  
391 in 41 out of the 300 samples (13.67% of samples) across both species. There were 16  
392 trees with ancestry coefficients higher than 10% assignment to the other species: four *P.*  
393 *rigida* samples (2.29% of sampled *P. rigida*) and twelve *P. pungens* samples (9.60% of  
394 sampled *P. pungens*). Admixture proportions were moderately correlated to latitude  
395 (Pearson's  $r = -0.414$ ), longitude (Pearson's  $r = -0.291$ ), and elevation (Pearson's  $r =$   
396 0.445). All three correlative relationships were significant ( $p < 0.001$ ).

397

## Divergence amid recurring gene flow

398 Pairwise  $F_{ST}$  estimates for *P. pungens* ranged from 0 to 0.0457, while a similar but  
399 narrower range of values (0 – 0.0257) was noted for *P. rigida*. The highest pairwise  $F_{ST}$   
400 value across both species was between two *P. pungens* populations located in Virginia,  
401 PU\_DT and PU\_BB (Table 1). Interestingly, PU\_DT in general had higher pairwise  $F_{ST}$   
402 values (0.0146 – 0.0457) compared to all the other sampled *P. pungens* populations  
403 (Online Resource 1). For *P. rigida*, the RI\_SH population located in Ohio had higher  
404 pairwise  $F_{ST}$  values for 16 out of the 18 comparisons (0.0123 – 0.0257). The two  
405 populations that had low pairwise  $F_{ST}$  values with RI\_SH were geographically nearby:  
406 RI\_OH located in Ohio (pairwise  $F_{ST} = 0$ , distance: 90.1 km) and RI\_KY located in  
407 Kentucky (pairwise  $F_{ST} = 0.0089$ , distance: 107.7 km). The highest pairwise  $F_{ST}$  value  
408 among *P. rigida* populations was between RI\_SH and RI\_HH, which are geographically  
409 distant from one another. From the Mantel tests for IBD and IBE, Pearson correlations  
410 were low (Table 2). The correlation with geographical distances was highest for *P. rigida*  
411 (Mantel  $r = 0.176$ ,  $p = 0.055$ ). From the Mantel test, Pearson correlation between  
412 geographic distance and environmental distance was high for both *P. rigida* ( $r = 0.611$ ,  $p$   
413  $= 0.001$ ) and *P. pungens* ( $r = 0.893$ ,  $p = 0.001$ ). Observed heterozygosity of *P. pungens*  
414 ( $H_o = 0.127 \pm 0.015$  SD), averaged across SNPs and populations, was higher than the  
415 average expected heterozygosity ( $H_e = 0.118 \pm 0.008$  SD), both of which were higher than  
416 the almost equal values for *P. rigida* ( $H_o = 0.102 \pm 0.009$  SD;  $H_e = 0.104 \pm 0.005$  SD;  
417 Table 2). Heterozygosity estimates for each population are listed in Table 1. Across both  
418 species, observed heterozygosity was mildly associated with geography and elevation.  
419 For *P. rigida*, the highest correlation was with elevation ( $r = 0.253$ ), followed by correlation  
420 with longitude ( $r = 0.113$ ). Observed heterozygosity in *P. pungens* had a negative

## Divergence amid recurring gene flow

421 correlative relationship with elevation ( $r = -0.168$ ) and positive correlative relationship with  
422 longitude ( $r = 0.175$ ). Correlations between latitude and heterozygosity were low in both  
423 species ( $r = 0.008$  for *P. rigida*;  $r = 0.08$  for *P. pungens*).

424

425 Population graphs provide a visualization of the relative genetic connectivity across and  
426 among populations, as well as the relative genetic diversity within each population. Edges  
427 in population graphs represent unique associations in allele frequencies between  
428 populations. Collinearity across measures of genetic connectivity between populations,  
429 or across species labels, leads to edges being dropped from the population graph.  
430 Consistent with the PCA, fastSTRUCTURE, and *F*-statistics results, two disjunct groups  
431 of populations were apparent in the population graph, with each group largely  
432 corresponding to species labels (Fig. 3). The exception was the PU\_DT population from  
433 *P. pungens*, which is located in Virginia, that showed genetic connectivity with two  
434 geographically distant populations from *P. rigida*, located in Ohio (RI\_SH) and Maine  
435 (RI\_ME).

436

437

### 438 ***Associations between genetic structure and environment***

439 The combined effects of climate and geography explained 4.16% ( $r^2$ ), or rather 1.52%  
440 (adj.  $r^2$ ), of the genetic variance across 2168 SNPs and 300 sampled trees. The first RDA  
441 axis accounted for the bulk of the explanatory variance (42.3%, Fig. 4) and was the only  
442 RDA axis with a p-value ( $p < 0.001$ ) less than commonly accepted thresholds of  
443 significance. Average elevation associated with *P. pungens* samples was 724.68 m ( $\pm$

## Divergence amid recurring gene flow

444 224.17 SD), while average elevation across *P. rigida* samples was lower (399.69 m, ±  
445 292.26 SD). The average for Bio15 (precipitation seasonality) was 11.33 (± 1.83 SD) for  
446 *P. pungens*, and higher for *P. rigida* (14.23 ± 3.97 SD). Precipitation seasonality is the  
447 coefficient of variation calculated from monthly mean precipitation values across the span  
448 of one year. Considering the standard deviations around the mean, overlap in values for  
449 elevation and precipitation seasonality provide some context to present day overlap in  
450 species distributions along the southern Appalachian Mountains. Comparisons of  
451 predictor loadings across both RDA axes show latitude, longitude, and Bio11 (mean  
452 temperature of the coldest quarter) as important to explaining the variance both within  
453 (RDA 2, 9.77%) and across species (RDA1).

454  
455 Partitioning the effects of each predictor set revealed that climate independently (i.e.,  
456 conditioned on geography) accounted for 31.93% of the explained variance. Geography  
457 independently (i.e., conditioned on climate) accounted for 34.10% of the explained  
458 variance. The confounded effect, due to the correlations inherent to the chosen  
459 geographic and climatic predictor variables, was 33.97%.

460

### 461 ***Species distribution modeling***

462 Past geographical distributions during the LIG, LGM, and HOL were predicted using  
463 MAXENT to form testable hypotheses within the demographic inference framework of  
464  $\partial\alpha\partial i$ , v.2.0.5. Because population structure within each of the focal species was not  
465 observed from our genetic data (i.e., no genetic clusters were identified), we produced  
466 SDMs using occurrence records across the full distributional range of each species. The

## Divergence amid recurring gene flow

467 best fit SDM for *P. pungens* used a linear and quadratic feature class with a 1.0  
468 regularization multiplier, while the SDM for *P. rigida* used a linear, quadratic, and hinge  
469 feature class with a regularization multiplier of 3.0. Best-fit models were those with the  
470 lowest AIC when evaluated against other models with varying feature class and  
471 regularization multiplier settings. The AUC associated with the training data of the *P.*  
472 *pungens* and *P. rigida* SDMs was 0.929 and 0.912, respectively. Metadata, data inputs,  
473 outputs, and statistical results for model evaluation are available in Online Resource 2.  
474 The climatic variables with the highest permutation importance were Bio11 (mean  
475 temperature of the coldest quarter) and Bio15 (precipitation seasonality) which  
476 contributed 41.1% and 39.7% to the *P. pungens* SDM and 19.5% and 62.4% to the *P.*  
477 *rigida* SDM. Of the five climate variables included in the RDA, Bio15 and Bio11 had the  
478 highest loadings along RDA axis 1, helping to explain differences across species. The  
479 tandem reporting of Bio15 and Bio11 importance to both genetic differentiation and  
480 species distributions could be indicative that these climatic variables were drivers in the  
481 divergence of these two species.

482  
483 Current SDMs indicate a larger area of suitable habitat for *P. rigida* (11,128 grid cells had  
484 > 0.5 habitat suitability) compared to *P. pungens* (6,632 grid cells) with the highest overlap  
485 (14.07% shared cells) across all four time points (Fig. 5). According to the SDM  
486 predictions, the areas of moderate to high suitability shifted, contracted, and expanded  
487 over time for both species, with overlapping areas of suitable habitat exhibiting some of  
488 these fluctuations as well. SDM predictions for HOL indicate the lowest overlap (8.25%  
489 of grid cells with > 0.5 habitat suitability), while LGM predictions indicate the highest

## Divergence amid recurring gene flow

490 overlap (16.33%). Contrastingly, calculations of overlap from full distributional predictions  
491 were the lowest (Schoener's  $D = 0.170$ ) for LGM followed by the LIG (Schoener's  $D =$   
492  $0.288$ ). The highest full distributional overlap was associated with the current SDM  
493 (Schoener's  $D = 0.612$ ).

494  
495 The ensemble prediction for *P. pungens* during the LGM shows multiple potential refugial  
496 areas. One of these areas may have been glaciated (Fig. 5). Likewise, multiple refugia  
497 were predicted for *P. rigida* during the LGM, but these areas were below the mapped  
498 glacial extent (~18 kya; Dyke 2003). Interspecific gene flow during the LGM may thus  
499 have been possible just south of the glacial extent as well as in a disjunct refugia farther  
500 south than where either species currently occurs. Modeled distributions of *P. pungens*  
501 and *P. rigida* during the HOL distributions were proximal to each other, with high habitat  
502 suitability west of and along the Appalachian Mountains. These distributions may have  
503 promoted both intraspecific and interspecific gene flow to occur ~6 kya. The above  
504 quantifications are based on the SDM predictions from ensembled GCMs for the HOL  
505 and LGM time periods. SDM predictions associated with each independent GCM  
506 (CCSM4, MIROC-ESM, and MPI-ESM) are available in Online Resource 4 (Fig. S2, Fig.  
507 S3).

508

### 509 ***Demographic modeling***

510 Results from the SDMs and fastSTRUCTURE analysis informed the hypothesis that  
511 divergence occurred with ongoing gene flow given the overlap in suitable habitat across  
512 the four time points. Gene flow was hypothesized to be symmetrical given the rather even

## Divergence amid recurring gene flow

513 distribution in admixture  $Q$ -scores across both species (Fig. 2). We further hypothesized  
514 effective population sizes to have been stable over the past 120,000 years as potentially  
515 impactful expansion or contraction in habitat suitability was not observed. The best  
516 replicate run (highest composite log-likelihood) for each of the twelve modeled divergence  
517 scenarios, their associated parameter outputs, and  $\Delta AIC$  ( $AIC_{\text{model } i} - AIC_{\text{best model}}$ ) are  
518 summarized in Online Resource 3. A model that allowed changes in both effective  
519 population size and rate of symmetrical gene flow across two time periods (PSCMIGCs)  
520 best fit the 2168 SNP data set (Table 2) and had small, normally distributed residuals  
521 (Fig. S5). This model was 20.84 AIC units better than the second best-fit model  
522 (PSCMIGs; Table 3), which had allowed change in population size estimates across two  
523 time intervals but only one symmetrical gene flow parameter was inferred, representing  
524 a constant rate across both time periods.

525  
526 Assuming a generation time of 15 years, the unscaled parameters from the best-fit model  
527 estimated an initial divergence time at 9.27 mya (95% CI: 7.60 – 10.94). With a 25-year  
528 generation time, initial divergence was estimated to be 15.44 mya (95% CI: 12.64 –  
529 18.24). The first time interval during divergence ( $T_1$ ) lasted 98.7% of the total divergence  
530 time with symmetrical gene flow ( $M_i$ ) occurring at a rate of 48.6 (95% CI: 33.1 – 64.1)  
531 migrants per generation (Fig. 6). Parameters associated with effective population size  
532 were independent of generation time. The effective size of the ancestral population ( $N_{\text{ref}}$ )  
533 was 203,431 (95% CI: 176,575 – 230,287; Fig. 6) prior to divergence. For most of the  
534 divergence history, *P. pungens* had an effective population size of  $N_{P1} = 5,767,720$  (95%  
535 CI: 791,500 – 10,743,940) while *P. rigida* had a relatively smaller, but still large, effective

## Divergence amid recurring gene flow

536 size of  $N_{R1} = 4,272,253$  (95% CI: 1,207,070 – 7,337,436). The second time interval ( $T_2$ )  
537 during divergence was estimated to have begun between 118,897 (15 year generation  
538 time; 95% CI: 111,400 – 126,394) and 198,115 (25 year generation time; 95% CI: 185,622  
539 – 210,608) years ago when effective population sizes decreased instantaneously to  
540 19,408 (95% CI: 18,160 – 20,656) for *P. pungens* ( $N_{P2}$ ) and 22,151 (95% CI: 20,710 –  
541 23,592) for *P. rigida* ( $N_{R2}$ ). During this time interval the relative rate of symmetrical gene  
542 flow dropped from 48.6 to 38.4 (95% CI: 35.7 – 41.1) migrants per generation.

543

544

## 545 **Discussion**

546

547 To understand the divergence history and development of reproductive isolation between  
548 *P. pungens* and *P. rigida*, we combined inferences of population structure, admixture,  
549 environmental associations, and historical species distribution modeling to form a testable  
550 hypothesis within a demographic inference framework. Our hypothesis was supported.  
551 Since the LIG, effective population sizes for both species did not change, and interspecific  
552 gene flow continued to occur. The best-fit demographic model using 2168 SNPs as  
553 summarized using the multidimensional site frequency spectrum also indicated that at the  
554 onset of the LIG there was a large reduction in effective population size which coincided  
555 with a reduction in gene flow. Even though gene flow occurred throughout the history of  
556 these two species, distinctive life histories and phenotypes have developed. The  
557 morphology and distributional differences across *P. pungens* and *P. rigida* suggest



## Divergence amid recurring gene flow

558 divergence was driven by fire and climate with phenological differences contributing to  
559 the maintenance of species boundaries through partial, prezygotic reproductive isolation.

560

561

### 562 ***Climate drives divergence***

563 Adaptation to seasonality among temperate species was influenced by Quaternary  
564 climate (Dobzhansky 1950; Savolainen et al. 2004; Jump and Penuelas 2005; Williams  
565 and Jackson 2007; Bonebrake and Mastrandrea 2010). Phenological traits have been  
566 linked to seasonal variation within species of North America (Jump and Penuelas 2005),  
567 and differences in seasonality requirements for *P. pungens* and *P. rigida* likely explain the  
568 observed phenological trait differences in seed size, reproductive age, timing of pollen  
569 release, and rates of seedling establishment across these two species (Zobel 1969; Della-  
570 Bianca 1990; Ledig et al. 2015). Using niche and trait data, the phylogenetic inference of  
571 Jin et al. (2021) identified precipitation seasonality (Bio15) and elevation as drivers of  
572 diversification in eastern North American pines. The results of our RDA corroborate these  
573 conclusions, as clear separation of species-level genetic differences was explained by  
574 Bio15 and elevation along axis 1 (Fig. 4). Quaternary climate began 2.6 mya and in terms  
575 of the total divergence time inferred for these two species (9.3 – 15.4 mya) adaptations  
576 to seasonality occurred rather recently (~16 – 25% of total divergence time). Based on  
577 our data, *P. pungens* has lower and narrower niche requirements in terms of Bio15, which  
578 helps explain its patchy distribution along the southern Appalachian Mountains. In  
579 contrast, populations of *P. rigida* may have evolved a response to increased precipitation

## Divergence amid recurring gene flow

580 seasonality during the Quaternary period, explaining its larger distribution and latitudinal  
581 expansion into northeastern North America.

582

583 Divergence between *P. pungens* and *P. rigida* began during the Miocene between 9.3  
584 and 15.4 mya, which is consistent with divergence times previously estimated for these  
585 two pine species (Gernandt et al. 2018; Jin et al. 2021). The evolution of fire-related traits  
586 in pines has been linked to the mid-Miocene period (Jin et al. 2021) suggesting fire as an  
587 initiator of differentiation across ancestral populations. Distributions of our focal species  
588 are locally divergent across slope aspects in the Appalachian Mountains, with *P. pungens*  
589 primarily distributed on southwestern slopes and *P. rigida* primarily distributed on  
590 southeastern slopes (Zobel 1969). Due to higher fire frequency and intensity on western  
591 slopes, *P. pungens* has evolved strategies that confer population persistence such as  
592 high cone serotiny and fast seedling development. Although some northern *P. rigida*  
593 populations exhibit serotiny, the populations found along the southern Appalachian  
594 Mountains, and proximal to *P. pungens*, have nonserotinous cones and other traits  
595 consistent with enduring fire (e.g., epicormics; Zobel 1969) as opposed to relying on it  
596 (Jin et al. 2021). With these factors in mind and the correlative evidence between fire  
597 intensity and level of serotiny presented across populations of other pine species (*P.*  
598 *halepensis* and *P. pinaster*; Hernandez-Serrano et al. 2013), we suspect genomic regions  
599 involved in the complex, polygenic trait of serotiny (Parchman et al. 2012; Budde et al.  
600 2014) may have contributed to the rapid development of prezygotic reproductive isolation  
601 between our focal species.

602

## Divergence amid recurring gene flow

### 603 ***Reproductive isolation can evolve rapidly during conifer speciation***

604 While *P. pungens* and *P. rigida* can be found on the same mountain and even established  
605 within a few meters of each other, mountains are heterogeneous, complex landscapes  
606 offering opportunity for niche evolution along multiple axes of biotic and abiotic influence  
607 for parental species and hybrids alike. The distances to disperse into novel environments  
608 are relatively short in these heterogeneous landscapes thus suggesting diversification  
609 could be more rapid as environmental complexity increases (Bolte and Eckert 2020).  
610 Mountains have rain shadow regions characterized by drought and thus more active fire  
611 regimes (Parisien and Moritz 2009). A host of adaptive traits in trees are associated with  
612 fire frequency and intensity (Pausas and Schwilk 2012). Among those, the genetic basis  
613 of serotiny is characterized as being polygenic with large effect loci in *P. contorta* Dougl.  
614 (Parchman et al. 2012) and in *P. pinaster* Aiton (Budde et al. 2014). Such genetic  
615 architectures, even in complex demographic histories such as the one described here,  
616 can evolve relatively rapidly to produce adaptive responses to shifting optima (e.g., Stetter  
617 et al. 2018; reviewed for forest trees by Lind et al. 2018), so that it is not unreasonable to  
618 expect divergence in fitness-related traits such as serotiny to also contribute to niche  
619 divergence and reproductive isolation. Considering large effect loci associated with  
620 serotiny were also associated with either water stress response, winter temperature, cell  
621 differentiation, or root, shoot, and flower development (Budde et al. 2014), serotiny may  
622 be a trait that contributes to widely distributed genomic islands of divergence thus  
623 explaining the development of ecologically based reproductive isolation between *P.*  
624 *pungens* and *P. rigida* amid recurring gene flow (Nosil and Feder 2012). Given that our  
625 focal species are reciprocally crossable to yield viable offspring (Critchfield 1963), it is

## Divergence amid recurring gene flow

626 likely that postzygotic ecological processes, such as selection for divergent fire-related  
627 and climatic niches limits hybrid viability in natural stands. Indeed, hybrids are rarely  
628 identified in sympatric stands (Zobel 1969; Brown 2021). Thus, it appears that niche  
629 divergence is associated with divergence in reproductive phenologies during speciation  
630 for our focal taxa. However, whether niche divergence reinforces reproductive isolation  
631 based on pollen release timing or divergent pollen release timing is an outcome of niche  
632 divergence itself remains an open question.

633

634 The rate of symmetrical gene flow in our best-fit demographic model was reduced by  
635 approximately 10 migrants per generation providing evidence that prezygotic  
636 reproductive isolation may have strengthened under Quaternary climatic conditions. This  
637 reduction reflects a scenario of reduced effective population sizes, reduced rates of  
638 migration ( $m$ ), or both. The rate of gene flow associated with a given time interval should  
639 not be interpreted as constant though. Sousa et al. (2011) found that posterior  
640 distributions for the timing of gene flow parameters in demographic inference were highly  
641 variable across the simulations they performed making pulses of gene flow (i.e., a gene  
642 flow event occurring within a time frame of no active gene flow), as probable as constant,  
643 ongoing gene flow. While acknowledging this blurs interpretation of parameter estimates  
644 for gene flow, a history with recurring gene flow events fits the narrative of prezygotic  
645 isolation being labile especially when geographical distributions or reproductive  
646 phenology are the factors involved. Indeed, observations of hybridization occurring  
647 between once-prezygotically isolated species have been made and suggests  
648 phenological barriers such as timing of pollen release and flowering may not be

## Divergence amid recurring gene flow

649 permanently established and can shift towards synchrony in warming climates (Vallejo-  
650 Marín and Hiscock 2016).

651

### 652 ***Climate instability reduces genetic diversity***

653 Conifers often have high genetic diversity and low population differentiation because of  
654 outcrossing, wind-dispersal, and introgression (Petit and Hampe 2006). *Pinus pungens*  
655 and *P. rigida* both have modest levels of genetic diversity within and across the  
656 populations we sampled, and no detectable within-species population structure given our  
657 genome-wide data. Our best fit model inferred a drastic effective population size reduction  
658 (*P. pungens*, ~99.7%; *P. rigida*, ~99.5%) between 118-198 kya. Since then, climate has  
659 continued to oscillate between glacial and interglacial periods for geologic time intervals  
660 too short for species with long generation times and low migratory potential to sufficiently  
661 track causing a mismatch between the breadth of a species' climatic niche and where  
662 populations are established (Svenning et al. 2015). This dynamic affects population  
663 persistence, reduces genetic variation within populations, and thus to some degree limits  
664 the potential for local adaptation in climatically unstable regions and may explain the lack  
665 of IBD and IBE across the populations of our focal species. Our SDM predictions showed  
666 substantial shifts in habitat suitability since the LIG providing evidence of high climate  
667 instability in temperate eastern North America during the Quaternary period.

668

669 From a theoretical standpoint, we anticipated the patchy, mountain top distribution of *P.*  
670 *pungens* to be characterized by strong patterns of population differentiation. Lack of  
671 structure in *P. pungens* could be attributed to long distant dispersal or a recent move up

## Divergence amid recurring gene flow

672 in elevation with genomes still housing elements of historical panmixia. Indeed, suitable  
673 habitat predictions during the HOL, just 6000 years ago, were rather contiguously  
674 distributed (Fig. 5) and may have allowed an increase in intraspecific gene flow. For *P.*  
675 *rigida* some structure differentiating the northern populations from those along the  
676 southern Appalachian Mountains was expected from an empirical standpoint because  
677 previously reported trait values in a common garden study led to identification of three  
678 latitudinally arranged genetic groupings (Ledig et al. 2015). Although structure analysis  
679 did not support groupings within *P. rigida*, our estimates for isolation-by-distance (IBD)  
680 yielded a correlation of 0.177 ( $p = 0.055$ ) which is suggestive of structure. While this  
681 shows some differentiation across its distribution, pairwise  $F_{ST}$  values were small and on  
682 average smaller than those between populations of *P. pungens* suggesting higher  
683 population connectivity in *P. rigida*. The SDM prediction for *P. rigida* during the LGM  
684 indicated three regions with high habitat suitability: a large region farther south than where  
685 it is currently distributed, one just east of the Appalachian Mountains, and another just  
686 south of the Laurentide ice sheet. While genetic differences may have accumulated in  
687 these separate refugia, the SDM prediction for the HOL were more compact and  
688 contiguous for *P. rigida*, as was similarly observed for *P. pungens*, thus providing greater  
689 potential for intraspecific gene flow across diverged populations.

690

### 691 ***Future work and conclusions***

692 Conifers, especially pines, have large and complex genomes (> 20 Gbp), so it is important  
693 to first understand their demographic history, the prevalence of interspecific gene flow  
694 historically and currently, and the role climate and geography may have played in shaping

## Divergence amid recurring gene flow

695 standing levels of genetic diversity before expending valuable resources into a more  
696 elaborate genomic research endeavor. The divergence history of *P. pungens* and *P.*  
697 *rigida* involved a complex interplay of recurring interspecific gene flow and dramatic  
698 population size reductions associated with changes in climate. We suspect that low  
699 population differentiation within each species is linked to climate instability and the  
700 mismatch between being long-lived, sessile species struggling to track rapidly shifting  
701 climatic optima during complex demographic scenarios and that prezygotic isolating  
702 barriers linked to reproductive phenology are involved in the maintenance of species  
703 boundaries. The results of our demographic inference warrant more research into these  
704 two species and other coniferous species of this region. No studies to date have inferred  
705 divergence histories for pine species native to eastern North America, and to our  
706 knowledge, only one other inference for conifer speciation has been conducted for this  
707 region, *Picea mariana* and *P. rubens*, and it was an interesting, rare account for  
708 progenitor-derivative speciation (Perron et al. 2000). Future detailed examinations of  
709 hybridization between *P. pungens* and *P. rigida* are needed to elucidate the role  
710 hybridization plays (e.g., adaptive or reinforcing) in the maintenance of species  
711 boundaries and identify environmental associations with hybrid establishment (e.g.,  
712 mountain aspect and elevation). Ideally, future research involving these two species  
713 would use a method that sufficiently captures genic regions so population structure in  
714 both species may be revealed and investigations into genomic islands of divergence that  
715 are often associated with ecological speciation can be performed (Nosil and Feder 2012).  
716

## Divergence amid recurring gene flow

717 While more time, effort, and genomic resources are needed for us to accurately predict  
718 gains and losses in biodiversity or describe the development of reproductive isolation in  
719 conifer speciation, we must recognize that some montane conifer species will be  
720 disproportionately affected by future climate projections (Aitken et al. 2008) and time is of  
721 the essence in terms of capturing and understanding current levels of biodiversity. High  
722 elevational species such as *P. pungens* may already be experiencing a tipping point, but  
723 because *P. pungens* is a charismatic Appalachian tree with populations already  
724 threatened by fire suppression practices over the last century, conservation efforts have  
725 begun through seed banking (Jetton et al. 2015) and prescribed burning experiments of  
726 natural stands (Welch and Waldrop 2001). Our contributions to these conservation efforts  
727 include genome-wide population diversity estimates for *P. pungens* and *P. rigida* and a  
728 demographic inference scenario that involves a long history of interspecific gene flow and  
729 hybridization. In conifer species of the family *Pinaceae*, there are multiple accounts of  
730 introgression occurring through hybrid zones (De La Torre et al. 2014; Hamilton et al.  
731 2015; Menon et al. 2018). The implications of introgression are far-reaching as it leads to  
732 greater genetic diversity and thus a greater capacity for adaptive evolution. Trees are  
733 keystone species, so understanding a population's potential to withstand environmental  
734 changes provides some insight into the future stability of an ecosystem.

735

736

737

738

### 739 **Author contributions**

740 CB performed field sampling of *Pinus rigida*, data analyses, and modeling. TF processed  
741 the genetic data and advised statistical analyses. CF led the field sampling and library  
742 prep for *Pinus pungens*, and AJE assisted with data analyses. All authors contributed to  
743 the writing of this manuscript.

744



## Divergence amid recurring gene flow

### 745 **Data Archiving Statement**

746 Raw reads generated during this study are available at NCBI SRA database under  
747 BioProject: PRJNA803632 (Sample IDs: SAMN25684544 – SAMN25684843). Python  
748 scripts for demographic modeling and R scripts for genetic analyses and producing  
749 SDMs are available at [www.github.com/boltece/Speciation\\_2pines](http://www.github.com/boltece/Speciation_2pines).

750

751

### 752 **Supplemental material:**

753 Online Resource 1: Summary statistics per SNP, sampled tree, and population

754 Online Resource 2: Metadata and files needed to reproduce SDMs

755 Online Resource 3: Results from demographic inference and parameter unscaling

756 Online Resource 4: Supplemental figures

757

758

759

### 760 **References:**

761 Abbott RJ (2017) Plant speciation across environmental gradients and the occurrence  
762 and nature of hybrid zones. *J Syst Evol* 55:238–258.  
763 <https://doi.org/10.1111/jse.12267>

764 Aiello-Lammens ME, Boria RA, Radosavljevic A, et al (2015) spThin: An R package for  
765 spatial thinning of species occurrence records for use in ecological niche models.  
766 *Ecography* 38:541–545. <https://doi.org/10.1111/ECOG.01132>

767

768 Aitken SN, Yeaman S, Holliday JA, et al (2008) Adaptation, migration or extirpation:  
769 climate change outcomes for tree populations. *Evol Appl* 1:95–111.  
770 <https://doi.org/10.1111/J.1752-4571.2007.00013.X>

771 Baack E, Melo MC, Rieseberg LH, Ortiz-Barrientos D (2015) The origins of reproductive  
772 isolation in plants. *New Phytol* 207:968–984. <https://doi.org/10.1111/NPH.13424>

773 Bagley JC, Heming NM, Gutiérrez EE, et al (2020) Genotyping-by-sequencing and  
774 ecological niche modeling illuminate phylogeography, admixture, and Pleistocene  
775 range dynamics in quaking aspen (*Populus tremuloides*). *Ecol Evol* 10:4609–4629.  
776 <https://doi.org/10.1002/ece3.6214>

777 Bolte CE, Eckert AJ (2020) Determining the when, where and how of conifer speciation:  
778 a challenge arising from the study ‘Evolutionary history of a relict conifer  
779 *Pseudotsuga chienii*.’ *Ann Bot* 125:v–vii. <https://doi.org/10.1093/AOB/MCZ201>

780 Bonebrake TC, Mastrandrea MD (2010) Tolerance adaptation and precipitation changes  
781 complicate latitudinal patterns of climate change impacts. *Proc Natl Acad Sci U S A*  
782 107:12581–12586. <https://doi.org/10.1073/pnas.0911841107>

## Divergence amid recurring gene flow

- 783 Brown AL (2021) Phenotypic characterization of Table Mountain (*Pinus pungens*) and  
784 pitch pine (*Pinus rigida*) hybrids along an elevational gradient in the Blue Ridge  
785 Mountains, Virginia. Thesis, Virginia Commonwealth University
- 786 Cannon CH, Petit RJ (2020) The oak syngameon: more than the sum of its parts. *New*  
787 *Phytol* 226:978–983. <https://doi.org/10.1111/nph.16091>
- 788 Capblancq T, Butnor JR, Deyoung S, et al (2020) Whole-exome sequencing reveals a  
789 long-term decline in effective population size of red spruce (*Picea rubens*). *Evol*  
790 *Appl* 13:2190. <https://doi.org/10.1111/EVA.12985>
- 791 Carstens BC, Richards CL (2007) Integrating coalescent and ecological niche modeling  
792 in comparative phylogeography. *Evolution* 61:1439–1454.  
793 <https://doi.org/10.1111/J.1558-5646.2007.00117.X>
- 794 Cavender-Bares J (2019) Diversification, adaptation, and community assembly of the  
795 American oaks (*Quercus*), a model clade for integrating ecology and evolution.  
796 *New Phytol* 221:669–692. <https://doi.org/10.1111/nph.15450>
- 797 Christe C, Stölting KN, Paris M, et al (2017) Adaptive evolution and segregating load  
798 contribute to the genomic landscape of divergence in two tree species connected  
799 by episodic gene flow. *Mol Ecol* 26:59–76. <https://doi.org/10.1111/mec.13765>  
800
- 801 Critchfield WB (1963) The Austrian x red pine hybrid. *Silvae Genet* 12:187-191
- 802 Critchfield WB (1967) Crossability and relationships of the closed-cone pines. *Silvae*  
803 *Genet* 16:89–97
- 804 Critchfield WB (1986) Hybridization and Classification of the White Pines (*Pinus* Section  
805 *Strobus*). *Taxon* 35:647–656
- 806 Danecek P, Auton A, Abecasis G, et al (2011) The variant call format and VCFtools.  
807 *Bioinformatics* 27:2156–2158. <https://doi.org/10.1093/bioinformatics/btr330>
- 808 De La Torre AR, Birol I, Bousquet J, et al (2014) Insights into conifer giga-genomes.  
809 *Plant Physiol* 166:1724–1732. <https://doi.org/10.1104/pp.114.248708>
- 810 De La Torre AR, Li Z, Van De Peer Y, Ingvarsson PK (2017) Contrasting rates of  
811 molecular evolution and patterns of selection among gymnosperms and flowering  
812 plants. *Mol Biol Evol* 34:1363–1377. <https://doi.org/10.1093/molbev/msx069>
- 813 Della-Bianca L (1990) *Pinus pungens* Lamb., Table Mountain pine. In: Burns, R.M. and  
814 B.H. Honkala (eds.). *Silvics of North America. Volume 1. Conifers*. USDA Forest  
815 Service Agriculture Handbook 654, Washington, D.C.
- 816 Dobzhansky T (1950) *Heredity, Environment, and Evolution*. *Assoc Adv Sci* 111:161-

## Divergence amid recurring gene flow

- 817 166. <https://doi.org/10.1126/science.111.2877.161>  
818
- 819 Dorman KW, Barber JC (1956) Time of flowering and seed ripening in southern  
820 pines. USDA Forest Service, Southeastern Forest Experiment Station, Old Station  
821 Paper SE-072, 72.  
822
- 823 Dyer RJ, Nason JD (2004) Population Graphs: The graph theoretic shape of genetic  
824 structure. *Mol Ecol* 13:1713–1727. [https://doi.org/10.1111/J.1365-](https://doi.org/10.1111/J.1365-294X.2004.02177.X)  
825 [294X.2004.02177.X](https://doi.org/10.1111/J.1365-294X.2004.02177.X)  
826
- 827 Dyke AS, Moore A, Robertson L (2003) Deglaciation of North America, Open File 1574,  
828 Natural Resources Canada, Ottawa.  
829
- 830 Fick SE, Hijmans RJ (2017) WorldClim 2: new 1-km spatial resolution climate surfaces  
831 for global land areas. *Int J Climatol* 37:4302–4315.  
832 <https://doi.org/10.1002/JOC.5086>
- 833 Francis RM (2017) pophelper: an R package and web app to analyse and  
834 visualize population structure. *Mol Ecol Resour* 17:27–32.  
835 <https://doi.org/10.1111/1755-0998.12509>
- 836 Fu L, Niu B, Zhu Z, et al (2012) CD-HIT: Accelerated for clustering the next-generation  
837 sequencing data. *Bioinformatics* 28:3150–3152.  
838 <https://doi.org/10.1093/bioinformatics/bts565>
- 839 Gao J, Wang B, Mao JF, et al (2012) Demography and speciation history of the  
840 homoploid hybrid pine *Pinus densata* on the Tibetan Plateau. *Mol Ecol* 21:4811–  
841 4827. <https://doi.org/10.1111/j.1365-294X.2012.05712.x>
- 842 Gernandt DS, Aguirre Dugua X, Vázquez-Lobo A, et al (2018) Multi-locus  
843 phylogenetics, lineage sorting, and reticulation in *Pinus* subsection *Australes*. *Am J*  
844 *Bot* 105:711–725. <https://doi.org/10.1002/AJB2.1052>  
845
- 846 Goudet J, Jombart T (2020) hierfstat, estimations and tests of hierarchical *F*-statistics. R  
847 package version 0.5-7. <https://CRAN.R-project.org/package=hierfstat>  
848
- 849 Gougherty A V., Chhatre VE, Keller SR, Fitzpatrick MC (2020) Contemporary range  
850 position predicts the range-wide pattern of genetic diversity in balsam poplar  
851 (*Populus balsamifera* L.). *J Biogeogr* 47:1246–1257.  
852 <https://doi.org/10.1111/jbi.13811>  
853
- 854 Gugger PF, Ikegami M, Sork VL (2013) Influence of late Quaternary climate change on  
855 present patterns of genetic variation in valley oak, *Quercus lobata* Née. *Mol Ecol*  
856 22:3598–3612. <https://doi.org/10.1111/MEC.12317>

## Divergence amid recurring gene flow

- 857 Gutenkunst RN, Hernandez RD, Williamson SH, Bustamante CD (2009) Inferring the  
858 joint demographic history of multiple populations from multidimensional SNP  
859 frequency data. *PLoS Genet* 5:1-11. <https://doi.org/10.1371/journal.pgen.1000695>
- 860 Hagman M (1975) Incompatibility in forest trees. *Proc R Soc London Ser B Biol Sci*  
861 188:313–326.
- 862 Hamilton JA, De la Torre AR, Aitken SN (2015) Fine-scale environmental variation  
863 contributes to introgression in a three-species spruce hybrid complex. *Tree Genet*  
864 *Genomes* 11. <https://doi.org/10.1007/s11295-014-0817-y>
- 865 Hapke A, Thiele D (2016) GlibPSs: a toolkit for fast and accurate analyses of  
866 genotyping-by-sequencing data without a reference genome. *Mol Ecol Resour*  
867 16:979–990. <https://doi.org/10.1111/1755-0998.12510>
- 868 Hernández-León S, Gernandt DS, Pérez de la Rosa J a., Jardón-Barbolla L (2013)  
869 Phylogenetic relationships and species delimitation in *Pinus* section *Trifoliae*  
870 inferred from plastid DNA. *PLoS One* 8:1–14.  
871 <https://doi.org/10.1371/journal.pone.0070501>
- 872 Hernández-Serrano A, Verdú M, González-Martínez SC, Pausas JG (2013) Fire  
873 structures pine serotiny at different scales. *Am J Bot* 100:2349–2356.  
874 <https://doi.org/10.3732/ajb.1300182>
- 875 Herten K, Hestand MS, Vermeesch JR, Van Houdt JKJ (2015) GBSX: A toolkit for  
876 experimental design and demultiplexing genotyping by sequencing experiments.  
877 *BMC Bioinformatics* 16:1-6. <https://doi.org/10.1186/s12859-015-0514-3>
- 878 Hewitt GM (2001) Speciation, hybrid zones and phylogeography - Or seeing genes in  
879 space and time. *Mol Ecol* 10:537–549. <https://doi.org/10.1046/J.1365-294X.2001.01202.X>  
880  
881
- 882 Hewitt GM (2004) Genetic consequences of climatic oscillations in the Quaternary.  
883 *Philos Trans R Soc Lond B* 359:183–195. <https://doi.org/10.1098/rstb.2003.1388>
- 884 Hickerson MJ, Carstens BC, Cavender-Bares J, et al (2010) Phylogeography's past,  
885 present, and future: 10 years after. *Mol Phylogenet Evol* 54:291–301.  
886 <https://doi.org/10.1016/J.YMPEV.2009.09.016>  
887
- 888 Hijmans RJ, Cameron SE, Parra JL, et al (2005) Very high resolution interpolated  
889 climate surfaces for global land areas. *Int J Climatol* 25:1965–1978.  
890 <https://doi.org/10.1002/JOC.1276>  
891
- 892 Hijmans RJ (2019). *geosphere*: Spherical trigonometry. R package version 1.5-10.  
893 <https://CRAN.R-project.org/package=geosphere>

## Divergence amid recurring gene flow

- 894 Hohenlohe PA, Day MD, Amish SJ, et al (2013) Genomic patterns of introgression in  
895 rainbow and westslope cutthroat trout illuminated by overlapping paired-end RAD  
896 sequencing. *Mol Ecol* 22:3002–3013. <https://doi.org/10.1111/mec.12239>
- 897 Ikeda DH, Max TL, Allan GJ, et al (2017) Genetically informed ecological niche models  
898 improve climate change predictions. *Glob Chang Biol* 23:164–176.  
899 <https://doi.org/10.1111/qcb.13470>
- 900 Jetton RM, Crane BS, Whittier WA, Dvorak WS (2015) Genetic resource conservation  
901 of Table Mountain pine (*Pinus pungens*) in the central and southern Appalachian  
902 Mountains. *Tree Plant Notes* 58:42–52  
903
- 904 Jin WT, Gernandt DS, Wehenkel C, et al (2021) Phylogenomic and ecological analyses  
905 reveal the spatiotemporal evolution of global pines. *Proc Natl Acad Sci USA* 118.  
906 <https://doi.org/10.1073/PNAS.2022302118/-/DCSUPPLEMENTAL>  
907
- 908 Ju M-M, Feng L, Yang J, et al (2019) Evaluating population genetic structure and  
909 demographic history of *Quercus spinosa* (Fagaceae) based on specific length  
910 amplified fragment sequencing. *Front Genet* 10:965.  
911 <https://doi.org/10.3389/FGENE.2019.00965>
- 912 Jump AS, Peñuelas J (2005) Running to stand still: Adaptation and the response of  
913 plants to rapid climate change. *Ecol Lett* 8:1010–1020.  
914 <https://doi.org/10.1111/j.1461-0248.2005.00796.x>
- 915 Kass JM, Muscarella R, Galante PJ, et al (2021) ENMeval 2.0: Redesigned for  
916 customizable and reproducible modeling of species' niches and distributions.  
917 *Methods Ecol Evol* 12:1602–1608. <https://doi.org/10.1111/2041-210X.13628>
- 918 Keller SR, Olson MS, Salim S, et al (2010) Genomic diversity, population structure, and  
919 migration following rapid range expansion in the Balsam poplar, *Populus*  
920 *balsamifera*. *Mol Ecol* 19:1212–1226. <https://doi.org/10.1111/j.1365-294X.2010.04546.x>  
921  
922
- 923 Keeley JE (2012) Ecology and evolution of pine life histories. *Ann For Sci* 69:445–453.  
924 <https://doi.org/10.1007/s13595-012-0201-8>  
925
- 926 Kim BY, Wei X, Fitz-Gibbon S, et al (2018) RADseq data reveal ancient, but not  
927 pervasive, introgression between Californian tree and scrub oak species (*Quercus*  
928 sect. *Quercus*: Fagaceae). *Mol Ecol* 27:4556–4571.  
929 <https://doi.org/10.1111/MEC.14869>
- 930 Kriebel HB (1972). Embryo development and hybridity barriers in the white pines  
931 (Section *Strobus*). *Silvae Genet* 21:39-44.

## Divergence amid recurring gene flow

- 932 Kulmuni J, Butlin RK, Lucek K, et al (2020) Towards the completion of speciation: The  
933 evolution of reproductive isolation beyond the first barriers: Progress towards  
934 complete speciation. *Philos Trans R Soc B Biol Sci* 375:20190528.  
935 <https://doi.org/10.1098/rstb.2019.0528>
- 936 Łabiszak B, Zaborowska J, Wójkiewicz B, Wachowiak W (2021) Molecular and paleo-  
937 climatic data uncover the impact of an ancient bottleneck on the demographic  
938 history and contemporary genetic structure of endangered *Pinus uliginosa*. *J Syst*  
939 *Evol* 59:596–610. <https://doi.org/10.1111/jse.12573>
- 940  
941 Lafontaine G de, Prunier J, Gérardi S, Bousquet J (2015) Tracking the progression of  
942 speciation: variable patterns of introgression across the genome provide insights on  
943 the species delimitation between progenitor–derivative spruces (*Picea mariana* × *P.*  
944 *rubens*). *Mol Ecol* 24:5229–5247. <https://doi.org/10.1111/MEC.13377>
- 945  
946 Lascoux M, Palmé AE, Cheddadi R, Latta RG (2004) Impact of Ice Ages on the genetic  
947 structure of trees and shrubs. *Philos Trans R Soc Lond B Biol Sci* 359:197–207.  
948 <https://doi.org/10.1098/rstb.2003.1390>
- 949  
950 Ledig FT, Smouse PE, Hom JL (2015) Postglacial migration and adaptation for  
951 dispersal in pitch pine (*Pinaceae*). *Am J Bot* 102:2074–2091.  
952 <https://doi.org/10.3732/AJB.1500009>
- 953  
954 Legendre P, Legendre L (2012) *Numerical Ecology*. Third Edition. Elsevier.
- 955  
956 Li L, Abbott RJ, Liu B, et al (2013) Pliocene intraspecific divergence and Plio-  
957 Pleistocene range expansions within *Picea likiangensis* (Lijiang spruce), a  
958 dominant forest tree of the Qinghai-Tibet Plateau. *Mol Ecol* 22:5237–5255.  
959 <https://doi.org/10.1111/MEC.12466>
- 960  
961 Lima JS, Telles MPC, Chaves LJ, et al (2017) Demographic stability and high historical  
962 connectivity explain the diversity of a savanna tree species in the Quaternary. *Ann*  
963 *Bot* 119:645–657. <https://doi.org/10.1093/AOB/MCW257>
- 964  
965 Lind BM, Menon M, Bolte CE, et al (2018) The genomics of local adaptation in trees:  
966 are we out of the woods yet? *Tree Genet Genomes* 14:29.  
<https://doi.org/10.1007/s11295-017-1224-y>
- 967  
968 Little EL Jr. (1971) *Atlas of United States trees, Vol. 1, conifers and important*  
969 *hardwoods: U.S. Department of Agriculture, 1146, 9, p200*
- 970  
971 Mantel N (1967) The detection of disease clustering and a generalized regression  
approach. *Cancer Research* 27: 209–220.
- 972  
973 McKinney GJ, Waples RK, Seeb LW, Seeb JE (2017) Paralogs are revealed by  
proportion of heterozygotes and deviations in read ratios in genotyping-by-

## Divergence amid recurring gene flow

- 974 sequencing data from natural populations. *Mol Ecol Resour* 17:656–669.  
975 <https://doi.org/10.1111/1755-0998.12613>
- 976 McKinney GJ, Waples RK, Pascal CE, et al (2018) Resolving allele dosage in  
977 duplicated loci using genotyping-by-sequencing data: A path forward for population  
978 genetic analysis. *Mol Ecol Resour* 18:570–579. <https://doi.org/10.1111/1755-0998.12763>  
979
- 980 McWilliam JR (1959) Interspecific Incompatibility in *Pinus*. *Am J Bot* 46:425–433
- 981 Menon M, Bagley JC, Friedline CJ, et al (2018) The role of hybridization during  
982 ecological divergence of southwestern white pine (*Pinus strobiformis*) and limber  
983 pine (*P. flexilis*). *Mol Ecol* 27:1245–1260. <https://doi.org/10.1111/MEC.14505>  
984
- 985 Michaux, FA (1819) *The North American Sylva, or A description of the forest trees of*  
986 *the United States, Canada and Nova Scotia considered particularly with respect to*  
987 *their use in the arts, and their introduction into commerce; to which is added a*  
988 *description of the most useful of the European forest trees: illustrated by 156*  
989 *coloured engravings.* C. d’Hautel, Paris <https://doi.org/10.5962/bhl.title.48807>  
990
- 991 Nosil, P (2012) *Ecological Speciation.* Oxford: Oxford University Press.  
992 <https://doi.org/10.1093/acprof:osobl/9780199587100.001.0001>
- 993 Nosil P, Feder JL (2012) Widespread yet heterogeneous genomic divergence. *Mol Ecol*  
994 21:2829–2832. <https://doi.org/10.1111/j.1365-294X.2012.05580.x>
- 995 Oksanen J, Blanchet FG, Friendly M, et al (2020) vegan: Community ecology package.  
996 R package version 2.5-7. <https://CRAN.R-project.org/package=vegan>  
997
- 998 Otto-Bliesner BL, Marshall SJ, Overpeck JT, et al (2006) Simulating Arctic climate  
999 warmth and icefield retreat in the last interglaciation. *Sci* 311:1751–1753.  
1000 <https://doi.org/10.1126/science.1120808>
- 1001 Parchman TL, Gompert Z, Mudge J, et al (2012) Genome-wide association genetics of  
1002 an adaptive trait in lodgepole pine. *Mol Ecol* 21:2991–3005.  
1003 <https://doi.org/10.1111/j.1365-294X.2012.05513.x>
- 1004 Parchman TL, Jahner JP, Uckele KA, et al (2018) RADseq approaches and applications  
1005 for forest tree genetics. *Tree Genet. Genomes* 14. <https://doi.org/10.1007/s11295-018-1251-3>  
1006
- 1007 Parisien MA, Moritz MA (2009) Environmental controls on the distribution of wildfire at  
1008 multiple spatial scales. *Ecol Monogr* 79:127–154. <https://doi.org/10.1890/07-1289.1>

## Divergence amid recurring gene flow

- 1009 Park B, Donoghue MJ (2019) Phylogeography of a widespread eastern North American  
1010 shrub, *Viburnum lantanoides*. *Am J Bot* 106:389–401.  
1011 <https://doi.org/10.1002/AJB2.1248>
- 1012 Pausas JG, Schwilk D (2012) Fire and plant evolution. *New Phytol* 193:301–303.  
1013 <https://doi.org/10.1111/j.1469-8137.2011.04010.x>
- 1014 Perron M, Perry DJ, Andalo C, Bousquet J (2000) Evidence from sequence-tagged-site  
1015 markers of a recent progenitor-derivative species pair in conifers. *Proc Natl Acad*  
1016 *Sci USA* 97:11331–11336. <https://doi.org/10.1073/PNAS.200417097>
- 1017 Peterson BK, Weber JN, Kay EH, et al (2012) Double digest RADseq: An inexpensive  
1018 method for de novo SNP discovery and genotyping in model and non-model  
1019 species. *PLoS One* 7:e37135 . <https://doi.org/10.1371/journal.pone.0037135>
- 1020 Peterson AT, Anamza T (2015) Ecological niches and present and historical geographic  
1021 distributions of species: A 15-year review of frameworks, results, pitfalls, and  
1022 promises. *Folia Zool* 64:207–217. <https://doi.org/10.25225/FOZO.V64.I3.A3.2015>  
1023
- 1024 Petit RJ, Hampe A (2006) Some evolutionary consequences of being a tree. *Annu Rev*  
1025 *Ecol Evol Syst* 37:187-214.  
1026 <https://doi.org/10.1146/annurev.ecolsys.37.091305.110215>  
1027
- 1028 Phillips SJ, Anderson RP, Dudík M, et al (2017) Opening the black box: an open-source  
1029 release of Maxent. *Ecography* 40:887–893. <https://doi.org/10.1111/ECOG.03049>
- 1030 Puritz JB, Hollenbeck CM, Gold JR (2014) dDocent: A RADseq, variant-calling pipeline  
1031 designed for population genomics of non-model organisms. *PeerJ* 2:e431.  
1032 <https://doi.org/10.7717/peerj.431>
- 1033 R Core Team (2021) R: A Language and environment for statistical computing. R  
1034 Foundation for Statistical Computing, Vienna, Austria. URL [https://www.R-](https://www.R-project.org/)  
1035 [project.org/](https://www.R-project.org/)
- 1036 Raj A, Stephens M, Pritchard JK (2014) FastSTRUCTURE: Variational inference of  
1037 population structure in large SNP data sets. *Genetics* 197:573–589.  
1038 <https://doi.org/10.1534/genetics.114.164350>
- 1039 Richards CL, Carstens BC, Lacey Knowles L (2007) Distribution modelling and  
1040 statistical phylogeography: An integrative framework for generating and testing  
1041 alternative biogeographical hypotheses. *J. Biogeogr.* 34:1833–1845.  
1042 <https://doi.org/10.1111/j.1365-2699.2007.01814.x>  
1043
- 1044 Saladin B, Leslie AB, Wüest RO, et al (2017) Fossils matter: improved estimates of  
1045 divergence times in *Pinus* reveal older diversification. *BMC Evol Biol* 17:95.  
1046 <https://doi.org/10.1186/S12862-017-0941-Z>



## Divergence amid recurring gene flow

- 1047  
1048 Savolainen O, Bokma F, García-Gil R, et al (2004) Genetic variation in cessation of  
1049 growth and frost hardiness and consequences for adaptation of *Pinus sylvestris* to  
1050 climatic changes. For Ecol Manage 197:79–89.  
1051 <https://doi.org/10.1016/j.foreco.2004.05.006>
- 1052 Seehausen O, Butlin RK, Keller I, et al (2014) Genomics and the origin of species. Nat  
1053 Rev Genet 15:176–192. <https://doi.org/10.1038/nrg3644>
- 1054 Soltis DE, Morris AB, McLachlan JS, et al (2006) Comparative phylogeography of  
1055 unglaciated eastern North America. Mol Ecol 15:4261–4293.  
1056 <https://doi.org/10.1111/j.1365-294X.2006.03061.x>
- 1057 Sousa VC, Grelaud A, Hey J (2011) On the nonidentifiability of migration time estimates  
1058 in isolation with migration models. Mol Ecol 20:3956–3962.  
1059 <https://doi.org/10.1111/j.1365-294X.2011.05247.x>
- 1060 Stetter MG, Thornton K, Ross-Ibarra J (2018) Genetic architecture and selective  
1061 sweeps after polygenic adaptation to distant trait optima. PLoS Genet  
1062 14:e1007794. <https://doi.org/10.1101/313247>
- 1063 Svenning JC, Eiserhardt WL, Normand S, et al (2015) The Influence of Paleoclimate on  
1064 Present-Day Patterns in Biodiversity and Ecosystems. Annu Rev Ecol Syst  
1065 46:551–572. <https://doi.org/10.1146/annurev-ecolsys-112414-054314>
- 1066 Vallejo-Marín M, Hiscock SJ (2016) Hybridization and hybrid speciation under global  
1067 change. New Phytol 211:1170–1187. <https://doi.org/10.1111/nph.14004>
- 1068 Vasilyeva G, Goroshkevich S (2018) Artificial crosses and hybridization frequency in  
1069 five-needle pines. Dendrobiology 80:123–130.  
1070 <https://doi.org/10.12657/denbio.080.012>
- 1071 Wang IJ, Bradburd GS (2014) Isolation by environment. Mol Ecol 23:5649–5662.  
1072 <https://doi.org/10.1111/mec.12938>
- 1073 Warren DL, Glor RE, Turelli M (2008) Environmental niche equivalency versus  
1074 conservatism: Quantitative approaches to niche evolution. Evolution 62:2868–2883.  
1075 <https://doi.org/10.1111/J.1558-5646.2008.00482.X>
- 1076 Warren DL, Matzke NJ, Cardillo M, et al (2021) ENMTools 1.0: an R package for  
1077 comparative ecological biogeography. Ecography 44:504–511.  
1078 <https://doi.org/10.1111/ecog.05485>
- 1079 Welch NT, Waldrop TA (2001) Restoring Table Mountain pine (*Pinus pungens* Lamb.)  
1080 communities with prescribed fire: An overview of current research. Castanea  
1081 66:42–49.

## Divergence amid recurring gene flow

- 1082 Williams JW, Jackson ST (2007) Novel climates, no-analog communities, and  
1083 ecological surprises. *Front Ecol Environ* 5:475–482. <https://doi.org/10.1890/070037>
- 1084 Wright S (1943) Isolation by distance. *Genetics* 28:114–138.
- 1085 Wright JW (1959) Species hybridization in the white pines. *Forest Sci* 5:210–222.
- 1086 Yang R-C (1998) Estimating hierarchical *F*-statistics. *Evolution* 52:950–956.  
1087 <https://doi.org/10.2307/2411227>
- 1088 Yang YX, Zhi LQ, Jia Y, et al (2020) Nucleotide diversity and demographic history of  
1089 *Pinus bungeana*, an endangered conifer species endemic in China. *J Syst Evol*  
1090 58:282–294. <https://doi.org/10.1111/jse.12546>
- 1091
- 1092 Zobel DB (1969) Factors affecting the distribution of *Pinus pungens*, an Appalachian  
1093 endemic. *Ecol Monogr* 39:303–333.
- 1094 Zou J, Sun Y, Li L, et al (2013) Population genetic evidence for speciation pattern and  
1095 gene flow between *Picea wilsonii*, *P. morrisonicola* and *P. neoveitchii*. *Ann Bot*  
1096 112:1829–1844. <https://doi.org/10.1093/AOB/MCT241>
- 1097
- 1098
- 1099
- 1100
- 1101
- 1102

## Divergence amid recurring gene flow

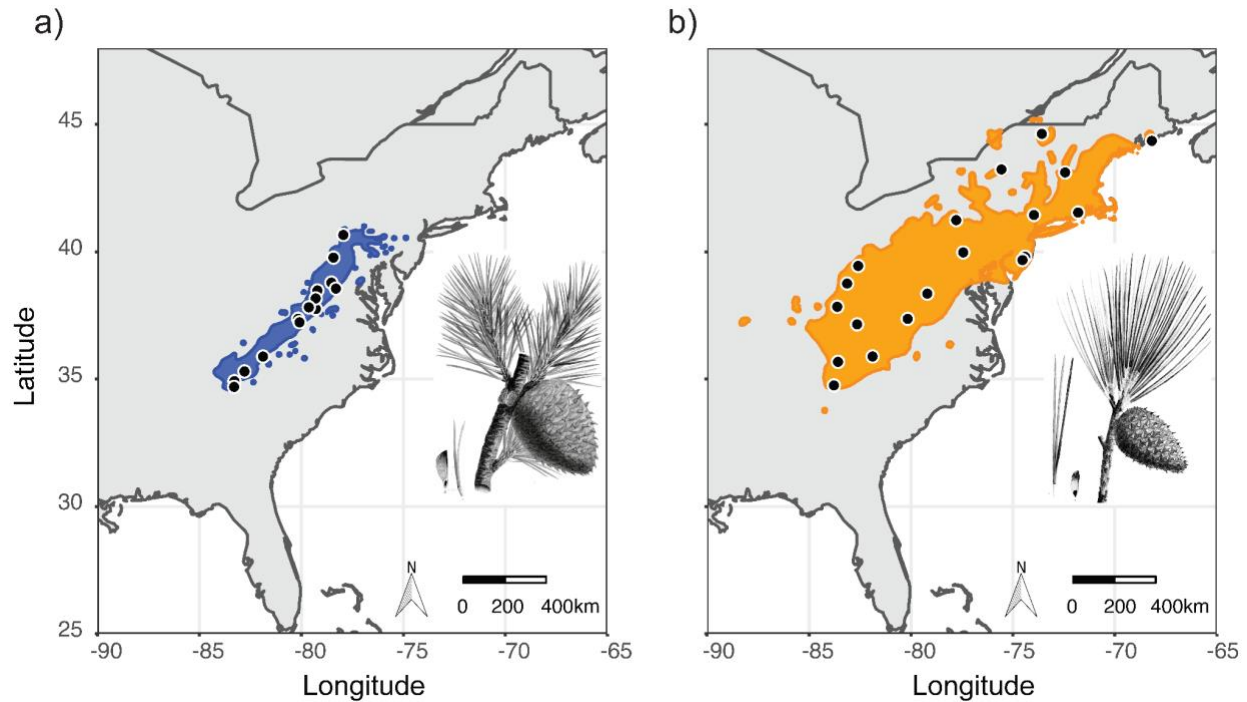

1103  
1104  
1105  
1106  
1107  
1108  
1109  
1110  
1111  
1112  
1113  
1114  
1115  
1116  
1117  
1118  
1119  
1120  
1121  
1122  
1123  
1124  
1125  
1126  
1127  
1128

**Fig. 1** Known geographical distribution of focal species, a) *Pinus pungens* and b) *P. rigida*, (Little 1971) in relation to populations sampled (black dots) for genetic analysis; Phenotypic characterization of each species was illustrated by Pierre-Joseph Redouté (Michaux 1819)

## Divergence amid recurring gene flow

1129 **Table 1** Location of sampled populations, number of trees ( $n$ ) that were sampled, and the  
 1130 observed heterozygosity ( $H_o$ ) versus the expected heterozygosity ( $H_e = 2pq$ ) for *Pinus*  
 1131 *pungens* and *P. rigida* populations.  
 1132

| Species           | Code  | Location                        | Lat   | Long   | $n$ | $H_o$ | $H_e$ |
|-------------------|-------|---------------------------------|-------|--------|-----|-------|-------|
| <i>P. pungens</i> | PU_BB | Briery Branch, VA               | 38.48 | -79.22 | 8   | 0.110 | 0.108 |
| <i>P. pungens</i> | PU_BN | Buchanan State Forest, PA       | 39.77 | -78.43 | 6   | 0.141 | 0.121 |
| <i>P. pungens</i> | PU_BV | Buena Vista, VA                 | 37.76 | -79.29 | 11  | 0.124 | 0.120 |
| <i>P. pungens</i> | PU_DT | Dragon's Tooth, VA              | 37.37 | -80.16 | 7   | 0.101 | 0.098 |
| <i>P. pungens</i> | PU_EG | Edinburg Gap, VA                | 38.79 | -78.53 | 8   | 0.139 | 0.124 |
| <i>P. pungens</i> | PU_EK | Elliott Knob, VA                | 38.17 | -79.30 | 10  | 0.131 | 0.123 |
| <i>P. pungens</i> | PU_GA | Walnut Fork, GA                 | 34.92 | -83.28 | 10  | 0.129 | 0.123 |
| <i>P. pungens</i> | PU_LG | Looking Glass Rock, NC          | 35.30 | -82.79 | 8   | 0.130 | 0.119 |
| <i>P. pungens</i> | PU_NM | North Mountain, VA              | 37.82 | -79.63 | 12  | 0.130 | 0.121 |
| <i>P. pungens</i> | PU_PM | Poor Mountain, VA               | 37.23 | -80.09 | 11  | 0.130 | 0.125 |
| <i>P. pungens</i> | PU_SC | Pine Mountain, VA               | 34.70 | -83.30 | 8   | 0.128 | 0.122 |
| <i>P. pungens</i> | PU_SH | Shenandoah NP, VA               | 38.55 | -78.31 | 5   | 0.160 | 0.128 |
| <i>P. pungens</i> | PU_SV | Stone Valley Forest, PA         | 40.66 | -77.95 | 9   | 0.110 | 0.110 |
| <i>P. pungens</i> | PU_TR | Table Rock Mountain, NC         | 35.89 | -81.88 | 12  | 0.113 | 0.114 |
| <i>P. rigida</i>  | RI_BR | Bass River State Forest, NJ     | 39.80 | -74.41 | 9   | 0.101 | 0.105 |
| <i>P. rigida</i>  | RI_CT | Pachaug State Forest, CT        | 41.54 | -71.81 | 10  | 0.096 | 0.107 |
| <i>P. rigida</i>  | RI_DT | Dragon's Tooth, VA              | 37.37 | -80.16 | 10  | 0.109 | 0.106 |
| <i>P. rigida</i>  | RI_GA | Chattahoochee NF, GA            | 34.75 | -83.78 | 9   | 0.096 | 0.103 |
| <i>P. rigida</i>  | RI_GW | George Washington NF, VA        | 38.36 | -79.20 | 10  | 0.102 | 0.103 |
| <i>P. rigida</i>  | RI_HH | Hudson Highlands State Park, NY | 41.44 | -73.97 | 7   | 0.102 | 0.101 |
| <i>P. rigida</i>  | RI_JF | Jefferson NF, VA                | 37.15 | -82.64 | 10  | 0.095 | 0.100 |
| <i>P. rigida</i>  | RI_KY | Daniel Boone NF, KY             | 37.84 | -83.62 | 9   | 0.113 | 0.110 |
| <i>P. rigida</i>  | RI_ME | Acadia NP, ME                   | 44.36 | -68.19 | 10  | 0.107 | 0.106 |
| <i>P. rigida</i>  | RI_MI | Michaux State Forest, PA        | 39.98 | -77.44 | 10  | 0.123 | 0.114 |
| <i>P. rigida</i>  | RI_NJ | Wharton State Forest, NJ        | 39.68 | -74.53 | 9   | 0.098 | 0.101 |
| <i>P. rigida</i>  | RI_NY | Macomb State Park, NY           | 44.63 | -73.58 | 9   | 0.101 | 0.104 |
| <i>P. rigida</i>  | RI_OH | South Bloomingville, OH         | 39.45 | -82.59 | 8   | 0.093 | 0.096 |
| <i>P. rigida</i>  | RI_RS | Rome Sand Plains, NY            | 43.23 | -75.56 | 9   | 0.097 | 0.103 |
| <i>P. rigida</i>  | RI_SH | Shawnee State Park, OH          | 38.75 | -83.13 | 9   | 0.082 | 0.094 |
| <i>P. rigida</i>  | RI_SP | Sproul State Forest, PA         | 41.24 | -77.78 | 9   | 0.106 | 0.105 |
| <i>P. rigida</i>  | RI_TN | Great Smoky Mountains NP, TN    | 35.68 | -83.58 | 8   | 0.099 | 0.104 |
| <i>P. rigida</i>  | RI_TR | Table Rock Mountain, NC         | 35.89 | -81.89 | 10  | 0.113 | 0.112 |
| <i>P. rigida</i>  | RI_VT | Bellows Falls, VT               | 43.11 | -72.44 | 10  | 0.098 | 0.104 |

1133  
 1134

## Divergence amid recurring gene flow

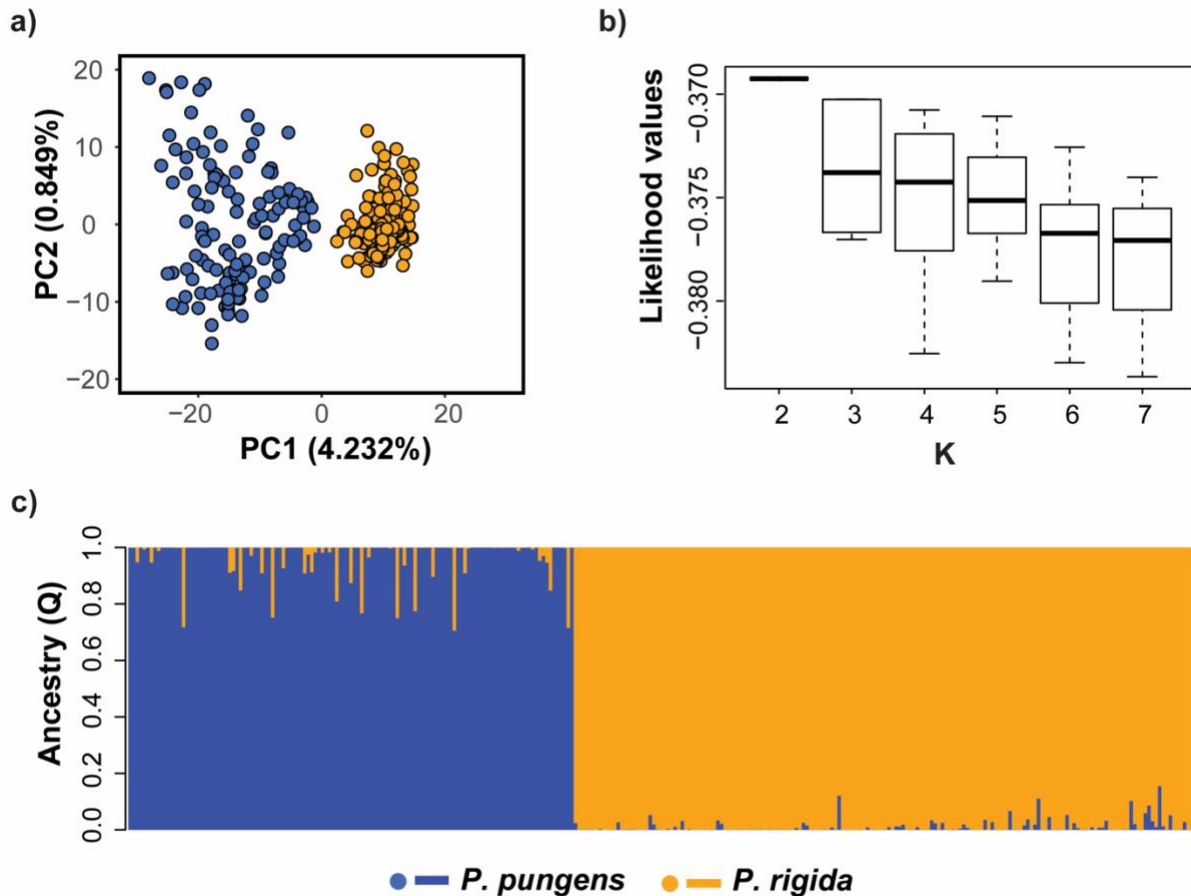

1135  
1136  
1137  
1138  
1139  
1140  
1141  
1142  
1143  
1144  
1145  
1146  
1147  
1148  
1149  
1150  
1151  
1152  
1153  
1154  
1155  
1156

**Fig. 2** Measures of genetic differentiation and diversity among sampled trees of *P. pungens* and *P. rigida*: a) Principal components analysis of 2168 genome-wide single nucleotide polymorphism (SNPs) for *Pinus pungens* (blue, left side of PC1) and *P. rigida* (orange, right side of PC1); b) log-likelihood values across ten replicate runs in fastSTRUCTURE for  $K = 2$  through  $K = 7$ ; c) results of averaged  $K = 2$  ancestry (Q) assignments for each sample arranged latitudinally in each species

## Divergence amid recurring gene flow

1157 **Table 2** Summary statistics of genetic differentiation for the sampled populations of *P.*  
1158 *rigida* and *P. pungens*. Expected ( $H_e$ ) and observed heterozygosity ( $H_o$ ) values are the  
1159 averages across 2168 SNPs averaged across populations.

1160

| Species           | $F_{ST}$<br>(95% CI)        | IBD $r$<br>( $p$ -value) | IBE $r$<br>( $p$ -value) | $H_e$<br>(range)       | $H_o$<br>(range)        |
|-------------------|-----------------------------|--------------------------|--------------------------|------------------------|-------------------------|
| <i>P. pungens</i> | 0.0057<br>(0.0032 - 0.0084) | -0.0789<br>(0.638)       | 0.0131<br>(0.411)        | 0.118<br>(0.098-0.129) | 0.127<br>(0.101-0.160)  |
| <i>P. rigida</i>  | 0.0056<br>(0.0032 - 0.0082) | 0.1758<br>(0.055)        | -0.0669<br>(0.633)       | 0.104<br>(0.094-0.114) | 0.102<br>(0.082 -0.123) |

1161

1162

1163

1164

1165

1166

1167

1168

1169

1170

1171

1172

1173

1174

1175

1176

1177

1178

## Divergence amid recurring gene flow

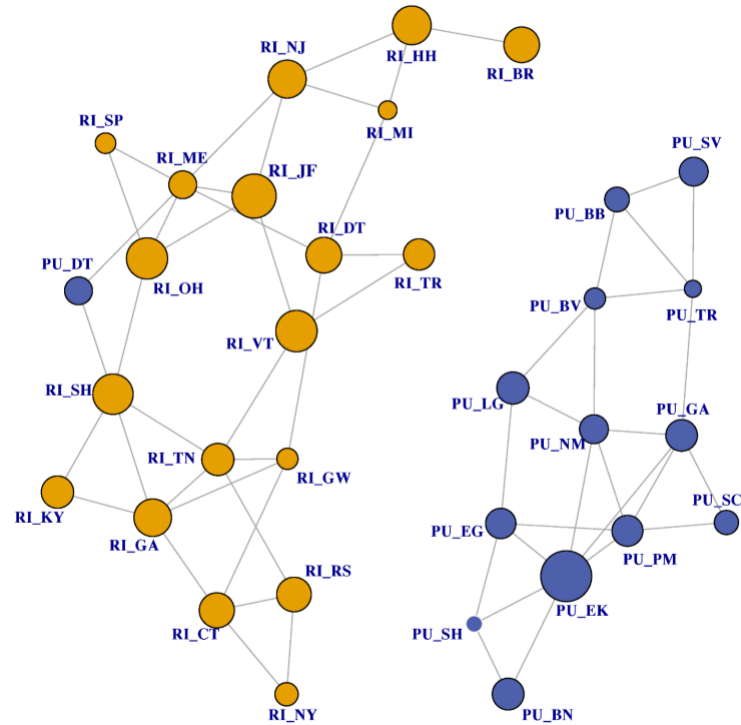

1179  
1180  
1181  
1182  
1183  
1184

**Fig. 3** Population graph reflecting the genetic relationships across all sampled populations of *P. pungens* (blue nodes, PU\_xx labels) and *P. rigida* (orange nodes; RI\_xx

## Divergence amid recurring gene flow

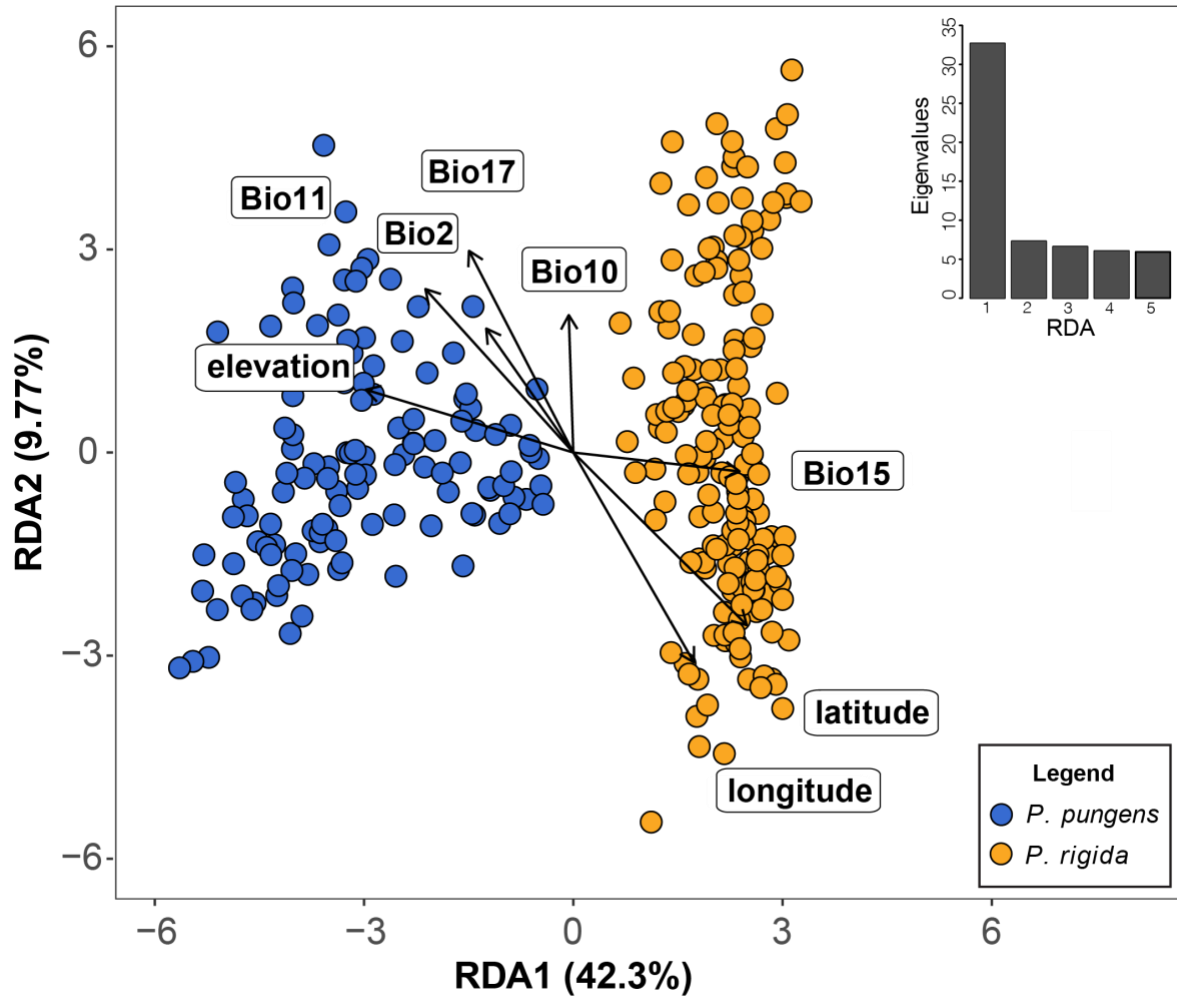

1185  
1186 **Fig. 4** Redundancy analysis (RDA) of the multilocus genotypes for each tree with climate  
1187 and geographic predictor variables (full model). Direction and length of arrows on each  
1188 RDA plot correspond to the loadings of each variable



## Divergence amid recurring gene flow

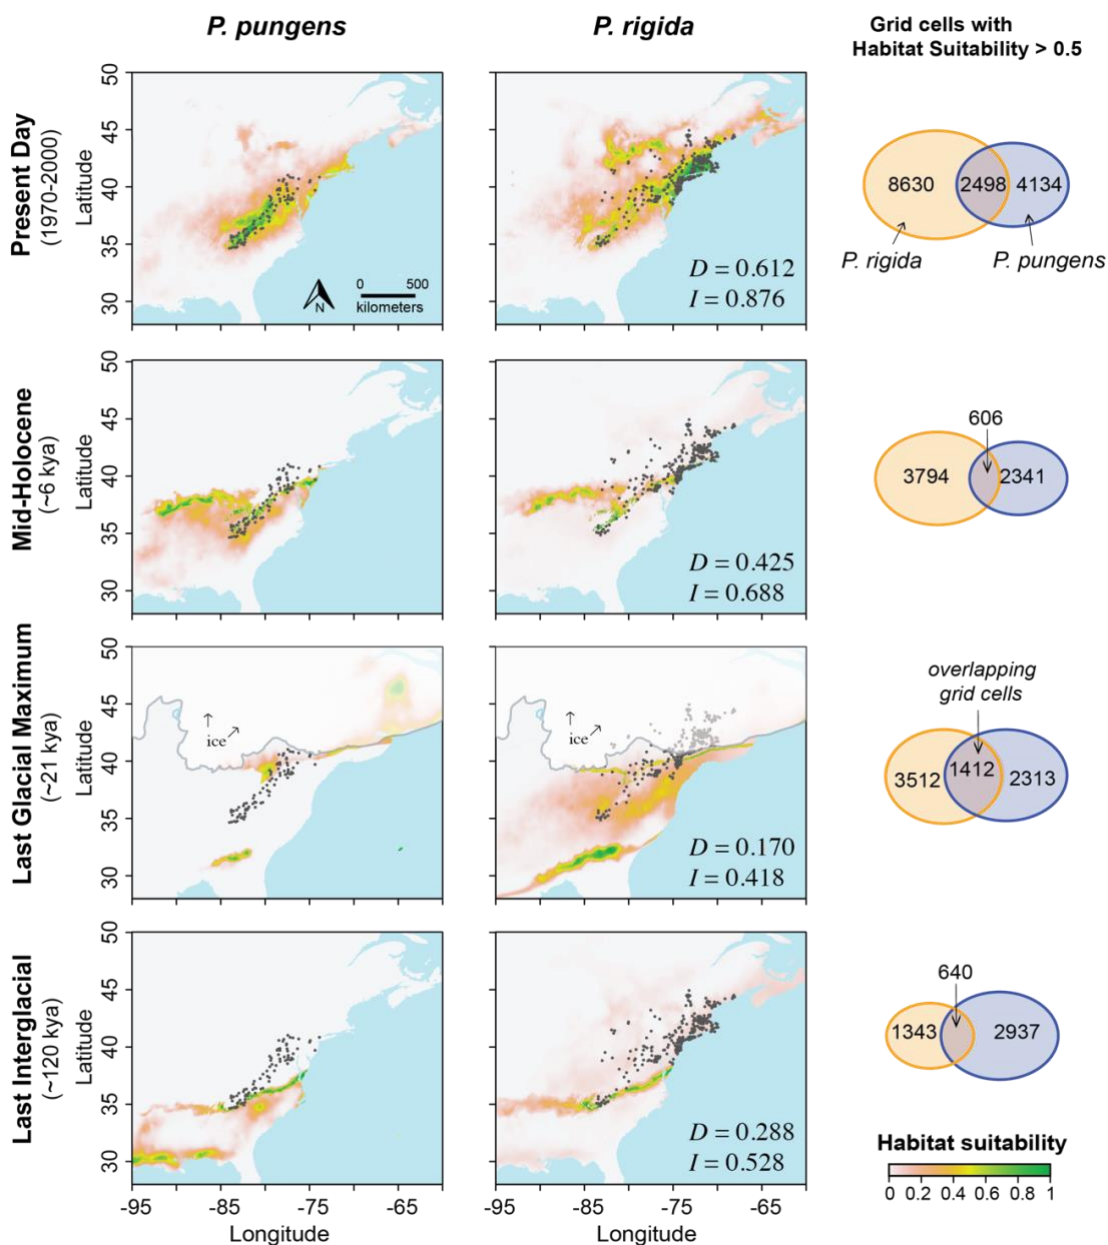

1189  
1190

1191 **Fig. 5** Species distribution model (SDM) predictions across four time points for *P.*  
1192 *pungens* and *P. rigida*. Measures of raster overlap in terms of Schoener's *D* and Warren's  
1193 *I* index between the models of each species, and at each time point, are presented in the  
1194 bottom right corner of the prediction plots for *P. rigida*. Venn diagrams illustrate the  
1195 number of grid cells with moderate to high habitat suitability scores (> 0.5) for each SDM  
1196 at a given time point, as well as the number of shared, or overlapping, grid cells. Blue  
1197 Venn diagram ovals show grid cell counts from the *P. pungens* SDM, and orange Venn  
1198 diagram ovals show grid cell counts from the *P. rigida* SDM for the aligning time point  
1199 (denoted on the left side). Glacial extent data (labeled ice in LGM plots) for 18 kya was  
1200 provided by Dyke (2003)

## Divergence amid recurring gene flow

1201  
1202  
1203  
1204  
1205  
1206  
1207

**Table 3** Results of model fitting for twelve representative demographic models of divergence. Models are ranked by the number of parameters ( $k$ ). Log-likelihood ( $\log L$ ) and Akaike information criterion (AIC) are provided for each model. Model details are given in the footnote.

| <b>Model</b>    | <b><math>k</math></b> | <b><math>\log L</math></b> | <b>AIC</b>      |
|-----------------|-----------------------|----------------------------|-----------------|
| SI              | 3                     | -2254.18                   | 4,514.37        |
| MIGs            | 4                     | -2201.51                   | 4,411.02        |
| MIGa            | 5                     | -2210.81                   | 4,431.62        |
| SCs             | 5                     | -2213.93                   | 4,437.86        |
| SGFs            | 5                     | -2229.65                   | 4,469.30        |
| SCa             | 6                     | -2238.03                   | 4,488.06        |
| SGFa            | 6                     | -2241.07                   | 4,494.14        |
| PSC             | 6                     | -2277.78                   | 4,567.56        |
| PSCSCs          | 7                     | -2178.16                   | 4,370.32        |
| PSCMIGs         | 7                     | -1866.42                   | 3,746.84        |
| PSCMIGa         | 8                     | -2117.91                   | 4,251.82        |
| <b>PSCMIGCs</b> | <b>9</b>              | <b>-1853.99</b>            | <b>3,726.00</b> |

1208 SI, strict isolation; MIGs, symmetrical gene flow; MIGa, asymmetrical gene flow; SCs, secondary contact  
1209 with symmetrical gene flow; SCa, secondary contact with asymmetrical gene flow; SGFa, speciation with  
1210 asymmetrical gene flow SGFs, speciation with symmetrical gene flow; PSC, population size change;  
1211 MIGCs, change in rate of symmetrical gene flow. The best-fit model is in bold.  
1212  
1213  
1214  
1215

## Divergence amid recurring gene flow

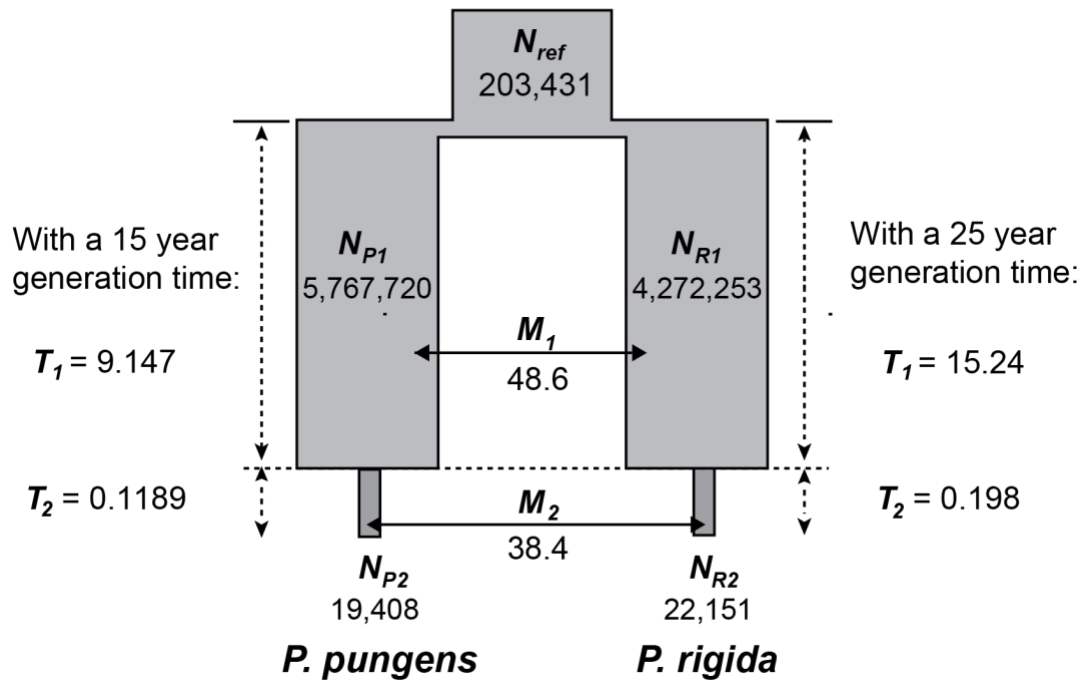

1216  
1217  
1218  
1219  
1220  
1221

**Fig. 6** The best-fit model (PSCMIGCs) and unscaled parameter estimates from  $\partial\alpha\partial i$  analysis. Time intervals ( $T_i$ ) are represented in millions of years and associated with lineage population sizes ( $N_i$ ) and a specific rate of symmetrical gene flow ( $M_i$ )
